# 1 **The thalamus drives light-evoked activity in the habenula of** 2 **larval zebrafish**

3 ♦Ruey-Kuang Cheng<sup>1</sup>, ♦Seetha Krishnan<sup>2</sup>, Qian Lin<sup>2</sup>, David G. C. Hildebrand<sup>3, 4</sup>, Isaac H.  
4 Bianco<sup>4</sup> and \*Suresh Jesuthasan<sup>1, 5, 6, 7</sup>

5 <sup>1</sup>Lee Kong Chian School of Medicine, Nanyang Technological University, Singapore  
6 636921.

7 <sup>2</sup>NUS Graduate School for Integrative Sciences and Engineering, 28 Medical Drive,  
8 National University of Singapore, Singapore 117456.

9 <sup>3</sup>Graduate Program in Neuroscience, Division of Medical Sciences, Graduate School of  
10 Arts and Sciences, Harvard University, Cambridge, Massachusetts 02138 United States  
11 of America.

12 <sup>4</sup>Department of Molecular and Cell Biology, Harvard University, Cambridge,  
13 Massachusetts 02138, United States of America.

14 <sup>5</sup>Neural Circuitry and Behavior Laboratory, Institute of Molecular and Cell Biology,  
15 Singapore 138673.

16 <sup>6</sup>Neuroscience and Behavioral Disorders Program, Duke-NUS Graduate Medical School,  
17 8 College Road, Singapore 169857.

18 <sup>7</sup>Department of Physiology, National University of Singapore, Singapore 117597.

19 \*Corresponding author: sureshj@ntu.edu.sg; +65 65869545

20 ♦equal contribution

## 21 **Abstract**

22       The habenula integrates sensory stimuli and reward information to regulate the  
23 release of neuromodulators with broad effects on brain state and behavior. One stimulus  
24 that affects habenula activity is light, but how it does so is unknown. Here, we address  
25 this question using larval zebrafish. Calcium imaging shows that light evokes widespread  
26 activity in habenula neurons, coupled with a prominent early response in the dorsal left  
27 neuropil. Injection of a lipophilic dye into this region retrogradely labels a retino-recipient  
28 thalamic nucleus. Anterograde tracing of the thalamus demonstrates a projection to the  
29 habenula, while optogenetic and lesion experiments confirm functional connectivity. An  
30 analysis of the mouse mesoscale connectome indicates that a visual nucleus in the  
31 thalamus, the ventral lateral geniculate nucleus, projects to the habenula in this species  
32 also. Together, these data suggest the existence of a conserved thalamo-habenula  
33 projection that enables light to affect habenula activity in vertebrates.

## 34 **Introduction**

35       The habenula is an evolutionarily conserved structure (Stephenson-Jones et al.,  
36 2012) that influences multiple behaviors, ranging from fear (Agetsuma et al., 2010; Lee  
37 et al., 2010; Zhang et al., 2016), to learning (Matsumoto and Hikosaka, 2007; 2009; Amo  
38 et al., 2014), addiction (Fowler et al., 2011), sleep (Aizawa et al., 2013), aggression  
39 (Chou et al., 2016; Golden et al., 2016) and performance under stress (Thornton and  
40 Davies, 1991). It acts by regulating the release of broadly-acting neuromodulators such  
41 as serotonin, dopamine, epinephrine and histamine (Wang and Aghajanian, 1977;  
42 Morley et al., 1985; Jhou et al., 2009; Quina et al., 2014). To precisely control these  
43 neuromodulators, such that behavior is appropriate for a given context, the habenula  
44 integrates diverse information including internal state, sensory stimuli and reward value.

45           These different types of information reach the habenula via different pathways.  
46 Internal states such as the circadian clock may be conveyed from the hypothalamus, for  
47 example by hypocretin-secreting neurons (Appelbaum et al., 2009). Negative reward  
48 causes the entopeduncular nucleus, or internal segment of the globus pallidus, to send  
49 excitatory input to the habenula (Hong and Hikosaka, 2008). Sensory stimuli such as  
50 odours evoke activity in the zebrafish habenula (Dreosti et al., 2014; Krishnan et al.,  
51 2014) via a direct pathway from the olfactory bulb (Miyasaka et al., 2009). Another  
52 stimulus that causes activity in the habenula is light, as has been demonstrated in rat  
53 (Zhao and Rusak, 2005), pigeon (Semm and Demaine, 1984) and zebrafish (Dreosti et  
54 al., 2014). How light affects the habenula is not known, implying the existence of an  
55 input pathway that is not yet well defined.

56           The habenula is divided into two major regions based on pattern of connectivity. In  
57 mammals, these are called the medial and lateral habenula, while in fish these are the  
58 dorsal and ventral habenula. In larval zebrafish, short pulses of red light cause  
59 asymmetric depolarization of the dorsal habenula, with more cells in the left side  
60 showing response; the response in the ventral habenula is symmetric (Dreosti et al.,  
61 2014). This response is dependent on the eyes (Dreosti et al., 2014), but no direct  
62 pathway from the retina to the habenula has been documented (Burrill and Easter, 1994;  
63 Robles et al., 2014). By retrograde tracing in adult zebrafish, Turner et al (Turner et al.,  
64 2016) proposed that the habenula receives input from the nucleus rostromedialis, a  
65 thalamic nucleus with retinal input that is found in fish (Butler and Saidel, 2003; Saidel,  
66 2013). However, no connectivity with the retina was shown, and because the thalamic  
67 nucleus does not asymmetrically innervate the left habenula and potential artifacts in  
68 labeling, the source of light-evoked activity in the habenula could not be determined  
69 (Turner et al., 2016). Here, using a combination of imaging, tracing and manipulation, we

70 demonstrate that light-evoked activity in the habenula of zebrafish larva is mediated by a  
71 thalamic nucleus with retinal input, i.e. the putative nucleus rostromedialis. We then ask  
72 whether a similar pathway could exist in mammals.

## 73 **Results**

### 74 **The habenula displays a broad and dynamic response to irradiance change**

75 The zebrafish habenula consists of neurons surrounding neuropils that are  
76 innervated by afferent neurons (Hendricks and Jesuthasan, 2007; Miyasaka et al., 2009;  
77 Amo et al., 2014; Turner et al., 2016). To gain insight into the neural circuits that enable  
78 light to influence the habenula, we first characterized habenula activity evoked by pulses  
79 of light. Two-photon imaging was performed on a transgenic zebrafish line expressing  
80 the calcium indicator GCaMP3 throughout the habenula (Krishnan et al., 2014) (Figure  
81 1A). Resonant-scanning, combined with piezo-driven focusing, was used to record the  
82 activity of cells at multiple focal planes (Figure 1B, C). With a step size of 10  $\mu\text{m}$ , so that  
83 each cell would be sampled only once, most of habenula could be covered with 5 planes  
84 at a rate of 1 Hz. Habenula activity was monitored as the larva was exposed to 20-  
85 second pulses of blue light. We used relatively long pulses, rather than brief flashes, to  
86 allow responses to transition as well as steady state to be identified. Pixel-wise analysis  
87 in one 7-day old fish indicates that evoked activity – both transient and sustained -  
88 occurred throughout the habenula in response to increase and decrease in irradiance  
89 and to light and darkness (Figure 1D, E). The spatio-temporal pattern of activity was  
90 reproducible across several cycles, as shown by the trajectory of the system through  
91 state space (Figure 1F).

92 To assess if these responses were reproducible across multiple fish, we imaged  
93 the habenula in 6 fish. Habenula neurons were segmented (Figure 2A-C; total of 4986



94 cells, with an average of  $831 \pm 53$  cells (95% CI) per fish) and their activity was clustered  
95 by *k*-means. Cluster centers were classified by response type. Transient and sustained  
96 responses to increase and decrease in irradiance could be reliably evoked (Figure 2D-G).  
97 The mean percentage of responding cells per fish ( $\pm 95\%$  CI) were ON:  $30.98 \pm 9.94\%$ ;  
98 OFF:  $19.03 \pm 3.93\%$ ; Inhibitory:  $7.93 \pm 3.50\%$ . Correlating the cells corresponding to the  
99 different response types revealed that, in general, neurons that were excited by an  
100 increase of irradiance did not fire to a decrease (Figure 2H, I). Some neurons that were  
101 inhibited by light did, however, show a response at light offset (Figure 2F, blue trace; see  
102 also Figure 1E, red trace). These observations confirm that the activity of zebrafish  
103 habenula neurons is affected by change in irradiance, and that in addition to excitation  
104 there is inhibition by light, as well as excitation to loss of light.

105         The s1011tGAL4 line drives GCaMP3 expression throughout the habenula, and  
106 the response in all focal planes imaged suggests that all domains of the habenula  
107 respond to change in light. To further test this, we imaged fish where specific domains  
108 could be identified. Using the *narp* promoter (Agetsuma et al., 2010) (Figure 3A-C),  
109 responses to light ON and OFF could be detected in the lateral subdomain of the dorsal  
110 habenula (dHbL) (Figure 3 D, G, H;  $n = 5$  fish). As we lacked a driver that is specific for  
111 the medial subdomain of the dorsal habenula (dHbM), we assessed activity here by  
112 analyzing *narp*-negative regions of the dorsal habenula in *narp:GAL4, UAS:DsRed,*  
113 *elav13:GCaMP6f* fish (Figure 3E, G, I;  $n = 5$  fish). Additionally, we analyzed the  
114 interpeduncular nucleus (IPN), which receives input from all regions of the dorsal  
115 habenula (deCarvalho et al., 2014). Evoked activity was seen in all domains of the  
116 interpeduncular nucleus (Figure 3K, L), consistent with all domains of the dorsal  
117 habenula showing a response to change in irradiance. To assess the ventral habenula,  
118 we imaged a line with a calcium indicator under the control of the *dao* promoter (Amo et

119 al., 2014). Again, evoked activity was seen (Figure 3F, G, J; n = 8 fish). These results  
120 indicate that all domains of the habenula in larval zebrafish respond to change in  
121 illumination.

122 To further characterize light evoked activity, we used high speed widefield  
123 microscopy. With 200 Hz imaging, a strong and rapid increase in fluorescence was  
124 detected in a discrete region in the dorsal left habenula (Figure 4A-F; n = 6 fish), as well  
125 as bilaterally in the thalamic region, soon after the onset of visible light. Two-photon  
126 microscopy at 13 Hz suggests that the rapid increase in the habenula occurs in the  
127 dorsal left neuropil (Figure 4G-I; n = 4 fish). The increase suggests that there is  
128 asymmetric activation of the dorsal habenula by light, potentially caused by a stronger  
129 input to the dorsal left neuropil. The bilateral activation in the thalamic region argues  
130 against the habenula asymmetry being an artifact of asymmetric illumination or reporter  
131 expression.

132 Taken together, these results suggest that the habenula afferents providing  
133 information about illumination should have the following properties. Firstly, they should  
134 terminate broadly within the habenula. Secondly, there should be stronger activity at light  
135 onset in terminals innervating the dorsal left neuropil. Thirdly, they should respond to  
136 increase or decrease in irradiance. Fourthly, they should cause excitation and inhibition,  
137 and may thus include excitatory and inhibitory neurons

### 138 **The thalamus provides input to the habenula**

139 We next searched for afferents that could provide such properties in larval  
140 zebrafish. We focused initially on inputs that could account for the asymmetry in the  
141 dorsal habenula. The entopeduncular nucleus (EN) is the major source of habenula  
142 afferents in teleosts (Yañez and Anadon, 1994), including zebrafish (Amo et al., 2014;

143 Turner et al., 2016). This nucleus is labeled in the *Et(sqKR11)* line (Lee et al., 2010),  
144 providing a simple way of visualizing EN afferents to the habenula. Some labeled fibers  
145 were detected in the dorsal left neuropil, indicating that the EN does provide some  
146 innervation to this region of the habenula (Figure 5A). However, labeling in this neuropil  
147 was relatively sparse, compared with other neuropils. We therefore hypothesized that  
148 there may be other inputs, from an anatomically distinct population, that targets this  
149 neuropil. To test this, the lipophilic tracer DiD was injected into the dorsal left neuropil (n  
150 = 6 fish). In all cases, neurons in the dorsal left habenula (which extend dendrites into  
151 the neuropil), the parapineal, and a thalamic nucleus located ventrally to both habenula  
152 (Figure 5B-D) were labeled.

153 DiD label was not detected in any other regions of the brain, and only rarely in the  
154 entopeduncular nucleus, suggesting that the thalamus is the major source of input to the  
155 dorsal left neuropil. This is consistent with the early activity seen in the thalamus (Figure  
156 4A-F). The label in the thalamus cannot represent anterograde label from the habenula,  
157 as tracing of projections from the habenula by expressing fluorescent proteins  
158 specifically in the habenula does not result in a projection to the thalamus (Movie 1).  
159 Moreover, the labeling of cell bodies in the thalamus (Figure 5D inset, E) indicates that  
160 this is likely to be a retrograde label. The neuropil of this thalamic nucleus contains  
161 terminals of retinal ganglion cells, as shown by Dil injection into the retina (Figure 5E).  
162 Thus, the habenula neuropil with a strong response to light is innervated by thalamic  
163 nuclei that receive retinal input. This is likely to be the nucleus rostromedialis.

164 Expressing a fluorescent protein in thalamic neurons, using the *s1020tGAL4* driver  
165 (Figure 5F, G), led to label of terminals throughout the habenula (Movie 2). Thus,  
166 although the dorsal left neuropil receives input from the thalamus, the thalamus  
167 projection is not restricted to this region of the habenula.

## 168 **The habenula may receive glutamatergic and GABAergic input from the thalamus**

169 As noted above, light caused both increase and decrease in activity of habenula  
170 neurons, implying that there may be excitatory and inhibitory afferents. Using an  
171 antibody to vGlut1/2, glutamatergic pre-synapses were detected in all neuropils of the  
172 habenula (Figure 5H), indicating the existence of excitatory afferents. GAD65/67 labeled  
173 puncta could also be detected in habenula neuropils (Figure 5I). In the lateral regions,  
174 corresponding to the ventral habenula, labeled streaks were detected adjacent to cell  
175 bodies. These labels were not located within habenula neurons, as they did not co-  
176 localize with cytoplasmic label provided by GCaMP3, nor did they fill the cytoplasm,  
177 implying that these puncta and streaks must reside in habenula afferents (i.e. axon  
178 terminals) such as those labeled in Movie 2. Labeled cell bodies were seen below the  
179 level of the habenula (see Movie 3). Consistent with this, GABAergic neurons could be  
180 detected in the dorsal thalamus using the transgenic line *Tg(gad1b:RFP, vGlut2a:GAL4,*  
181 *UAS:eGFP)* (Satou et al., 2013) (Figure 5J, K; Movie 4). No label was seen in the  
182 entopeduncular nucleus, which has previously been shown to be glutamatergic (Amo et  
183 al., 2014; Turner et al., 2016). These observations confirm that the thalamus contains  
184 both glutamatergic and GABAergic neurons, as described previously (Mueller, 2012),  
185 which may mediate light-evoked excitation and inhibition of habenula neurons.

## 186 **Optogenetic stimulation of the thalamus drives habenula activity**

187 The lipophilic and transgenic tracing experiments documented in Figure 5  
188 demonstrate anatomical connectivity from the thalamus to the habenula. To test  
189 functional connectivity, we used optogenetics. Channelrhodopsin-2 (ChR2) was  
190 expressed in thalamic neurons with the *s1020tGAL4* driver (Fig. 6A). Experiments were  
191 carried out on fish lacking eyes, to prevent a response to visual stimulation. Short pulses

192 of blue light reproducibly caused an increase in fluorescence of GCaMP6f in habenula  
193 neurons of fish with expression of ChR2 in the thalamus (Figure 6B, D, G). Some  
194 response was seen in fish without ChR2 expression (Fig. 6F), suggesting that some  
195 habenula response may be due to non-ocular sensors such as deep brain  
196 photoreceptors (Matos-Cruz et al., 2011; Fernandes et al., 2013). The larger response in  
197 fish with ChR2 expression, however, suggests that there is functional connectivity  
198 between the thalamus and the habenula.

### 199 **Irradiance change evokes activity in thalamus neurons**

200 If the thalamus provides afferents mediating illumination-dependent activity in the  
201 habenula, thalamic neurons should respond to increase and decrease of illumination. To  
202 test this, calcium imaging was carried out in *s1020tGAL4, UAS:GCaMP6s* transgenic  
203 fish. A response to increase and decrease in illumination was detected in cell bodies in  
204 the anterior thalamus (Figure 7A-F) in all fish imaged (n = 5). Dendrites in the neuropil of  
205 the thalamus also responded to change in illumination. Increase in irradiance caused  
206 activity more dorsally, while decrease caused activity more ventrally (Figure 7G-J). Thus,  
207 the thalamus has a response to both increase and decrease of illumination.

208 Habenula response to light has been shown to depend on the eyes (Dreosti et al.,  
209 2014). Thus, if the thalamus mediates habenula response to light, light-evoked activity  
210 here should depend on the eyes. Indeed, the robust responses to light were lost in fish  
211 lacking eyes (Figure 7K-S), consistent with this hypothesis.

### 212 **Functional asymmetry in light-evoked activity**

213 As shown in Figure 4G-I, light evokes strong activity in the dorsal neuropil of the  
214 left habenula. As the line used in this imaging experiment contains only labelled

215 habenula neurons, the response probably occur in dendrites. Given that there is no  
216 obvious anatomical asymmetry in thalamic input to the habenula (Figure 5F, G; see also  
217 Turner et al, 2016), we hypothesized that there may be functional asymmetry in activity  
218 within thalamic inputs. To test this, we imaged the terminals of thalamic axons using  
219 *s1020tGAL4, UAS:GCaMP6s* fish. Thalamic terminals in the dorsal left neuropil showed a  
220 greater activity compared to those in the right neuropil (Figure 8). Thus, preferential light-  
221 evoked activity in thalamic afferents that project to the dorsal left neuropil may underlie  
222 the asymmetric dorsal habenula response.

### 223 **Thalamic lesion inhibits habenula response to illumination change**

224 To further test if the thalamus contributes to light evoked activity in the habenula,  
225 we lesioned the thalamic neuropil with a two-photon laser. This technique is expected to  
226 injure fibers innervating the neuropil (Semmelhack et al., 2014). The laser was targeted  
227 to the neuropil of the putative nucleus rostromedialis, which was identified by first  
228 imaging the response to light pulses (Figure 9A, B). Lesioning led visible damage in the  
229 neuropil (Figure 9D), and to a reduction of evoked activity in the thalamus and habenula  
230 (Figure 9C, E-G, I, L, M). There was some variability in the effect (Figure 9N), possibly  
231 reflecting the limitations of this technique in enabling consistent ablation. Lesioning  
232 other targets of retinal ganglion cell axons, which are located more posteriorly, did not  
233 lead to a loss of light-evoked activity in the habenula (Figure 9G, I, J, K), indicating that  
234 this technique did not cause indiscriminate damage. These observations support the  
235 hypothesis that the putative nucleus rostromedialis of the thalamus has a role in light-  
236 evoked activity in the habenula of larval zebrafish.

### 237 **A thalamo-habenula projection in the mouse**

238 Finally, we asked whether a projection from the thalamus to the habenula,

239 especially from a visual nucleus, is restricted to zebrafish, or whether it could also exist  
240 in a mammal. To do this, we examined the mouse mesoscale connectome (Oh et al.,  
241 2014). A search of the connectivity database derived from AAV injections into p56 mice,  
242 using thalamus as the injection site and epithalamus as the target site, yielded 18 hits  
243 covering different thalamic nuclei. Three experiments (numbers 267538006, 525796603  
244 and 147212977) had been targeted to the ventral lateral geniculate nucleus. In one case  
245 (Figure 10), the anterograde tracer virus had been injected into a *Slc32a1-IRES-Cre*  
246 mouse, which expresses Cre in GABAergic neurons. Viral tracing in the mouse thus  
247 suggests that a visual nucleus in the thalamus projects to the habenula in a mammal.

## 248 Discussion

249 We have investigated how illumination conditions influence activity in the habenula  
250 of larval zebrafish. The pineal, although light responsive, does not innervate the  
251 zebrafish habenula (Yáñez et al., 2009) while the parapineal, which innervates the  
252 habenula, has been shown to be dispensable (Dreosti et al., 2014). Calcium imaging  
253 suggests that the afferent neurons mediating responses to light should terminate broadly  
254 in the habenula, cause stronger activity in the dorsal left neuropil, depolarize to increase  
255 or decrease in irradiance, and potentially include excitatory and inhibitory neurons.  
256 Several observations suggest that afferent neurons with these properties reside in the  
257 thalamus.

258 Lipophilic tracing of the habenula and transgenic labeling of thalamic neurons  
259 demonstrate that the thalamus directly innervates the larval zebrafish habenula. High-  
260 speed imaging with widefield microscopy suggests that there is correlated activity in the  
261 thalamus and habenula, consistent with functional connectivity. Although widefield  
262 imaging uses visible light to excite the reporter, the rate of imaging used here is faster  
263 than the rise time of GCaMP6f (Chen et al., 2013), so initial images reflect activity prior

264 to onset of the stimulating light. Further evidence for functional connectivity is provided  
265 by optogenetic stimulation of the thalamus, which causes a response in the habenula.  
266 Moreover, lesion of the thalamus reduced light-evoked activity in the habenula. The  
267 thalamus responds to both increase and decrease in illumination, and contains both  
268 excitatory and inhibitory neurons; no other source of GABAergic inputs to the zebrafish  
269 habenula has been described. Thus, by optical recording, anatomical tracing, activation  
270 and lesion, our data suggests that the thalamus mediates the habenula responses to  
271 irradiance change in larval zebrafish.

272 The region of the thalamus mediating activity in the habenula appears to be the  
273 nucleus rostromedialis, as proposed by Turner et al (2016). The neuropil here can be  
274 functionally separated into two domains, based on the response to light – excitation to  
275 light OFF in the ventral regions and excitation to light ON more dorsally. This neuropil  
276 contains two previously defined targets of retinal ganglion cells, AF2 and AF4 (Burrill and  
277 Easter, 1994). AF4 is innervated predominantly by M3 and M4 retinal ganglion cells  
278 (Robles et al., 2014), which extend their dendritic tree into the proximal layer of the inner  
279 plexiform layer and are considered ON neurons. AF2 is innervated by B1 retinal ganglion  
280 cells that have dendrites in the distal layer (Robles et al., 2014), and these may account  
281 for the OFF responses in the thalamus and habenula. This thalamic nucleus may also  
282 receive input from non-retinal sources, but this remains to be investigated. The loss of a  
283 thalamic response to light in fish lacking eyes, however, suggests that such contribution  
284 may be minor.

285 Light is a potent regulator of brain function. It can affect mood (Vandewalle et al.,  
286 2010), alertness (Badia et al., 1991), cognitive ability (LeGates et al., 2012) and  
287 movement (Aschoff, 1960; Burgess and Granato, 2007). These phenomena are  
288 sensitive to irradiance, not image formation, and are mediated by a number of sensors



289 including intrinsically-sensitive retinal ganglion cells whose targets include the thalamus  
290 (Hattar et al., 2006). The ability of light to affect normal movement patterns (Burgess et  
291 al., 2010) or to disrupt mood and cognition (LeGates et al., 2012) involves  
292 neuromodulators such as serotonin, and changing irradiance affects activity in the dorsal  
293 raphe (Fite et al., 2005; Cheng et al., 2016). Based on the data here, and the well-  
294 established roles of the habenula in regulating neuromodulators, we suggest that some  
295 of these effects of light may be mediated by the thalamic projection to the habenula.

296 A projection from the thalamus to the habenula may be evolutionarily conserved in  
297 vertebrates. In humans and rabbits, a thalamo-habenula projection was proposed many  
298 years ago based on degeneration experiments (Marburg, 1944; Cragg, 1961). Using  
299 retrograde tracing with horseradish peroxidase, a projection from the dorsal thalamus to  
300 the habenula was reported in a lizard (Díaz and Puelles, 1992). Hints of a projection can  
301 also be seen in a tracing experiment performed in rats (Moore et al., 2000). The large-  
302 scale mouse mesoscale connectome project (Oh et al., 2014), which uses viral-based  
303 anterograde tracing, provides the most recent evidence for a thalamo-habenula  
304 projection in a mammal. This technique suggests a projection from the ventral lateral  
305 geniculate nucleus and other thalamic nuclei to the habenula. It will be interesting to  
306 determine whether a similar anatomical connection exists in humans, as this may  
307 contribute to the high functional connectivity between the thalamus and habenula  
308 reported recently (Torrissi et al., 2016).

## 309 **Materials and Methods**

### 310 **Fish lines**

311 Experiments were performed in accordance with guidelines issued by the  
312 Institutional Animal Care and Use Committee of the Biological Resource Centre at

313 Biopolis, Singapore. Zebrafish (*Danio rerio*) lines used for this study were:  
314 *Tg(UAS:GCaMP6s)sq202*, *SqKR11Et*, *GAL4s1011t*, *GAL4s1020t*,  
315 *Tg(UAS:GCaMP3)sq200*, *Tg(elav13:GCaMP6f)a12200*, *Tg(UAS:ChR2-eYFP)* (Arrenberg  
316 et al., 2009) and AB wildtype.

317 *Tg(elav13:GCaMP6f)a12200* was generated by PCR amplification of the GCaMP6f  
318 open reading frame (Addgene plasmid 40755 (Chen et al., 2013)) with forward primer  
319 ataACTAGTgccaccATGGGTTCTCATCATCAT and reverse  
320 ataCCGCGGcTCACTTCGCTGTCATCATTTGTAC (restriction site and coding  
321 sequences are in upper case). This fragment was cloned into a plasmid with Tol2 arms  
322 flanking an upstream attR1-R2 cassette and the insertion site using restriction enzymes  
323 *SpeI* and *SacII*. Previously described *elav13* (*HuC*) *cis*-regulatory elements (Higashijima  
324 et al., 2003) were placed upstream via LR recombination (Invitrogen) with an attL flanked  
325 *elav13* entry clone. The resulting plasmid was then co-injected into 1-cell stage embryos  
326 at a concentration of 30 ng/ $\mu$ L with Tol2 transposase mRNA at a concentration of 30  
327 ng/ $\mu$ L. A single founder was selected based on high and spatially broad expression.  
328 Outcrossing this founder generated 50% GCaMP6f-positive embryos, which were  
329 selected to establish the line.

### 330 **Imaging**

331 Zebrafish larvae (aged 5 - 10 dpf) were anaesthetized in mivacurium and  
332 embedded in low-melting temperature agarose (1.2-2.0 % in E3) in a glass-bottom dish  
333 (Mat Tek). They were imaged on a Nikon two-photon microscope (A1RMP), attached to  
334 a fixed stage upright microscope, using a 25x water immersion objective (NA = 1.1). The  
335 femtosecond laser (Coherent Vision II) was tuned to 920 nm for GCaMP imaging. Stacks  
336 were collected in resonant-scanning mode with a 525/50 nm bandpass emission filter

337 and with 8x pixel averaging; single-plane images were collected in galvano-scanning  
338 mode with 2x pixel averaging. The sample size was based on (Dreosti et al., 2014).

339 Light stimuli were generated by 5 mm blue LEDs (458 nm peak emission). They  
340 were powered by a 5 V TTL signal from a control computer and synchronized with image  
341 capture using a National Instruments DAQ board, controlled by the Nikon Elements  
342 software. Light intensity at the sample was 0.13 mW/cm<sup>2</sup>.

343 For widefield microscopy, excitation was provided by LEDs (Cairn OptoLED) at  
344 470 nm. Images were captured on a Zeiss Axio Examiner with a 20x water immersion  
345 objective, using a Flash4 camera (Hamamatsu) controlled by MetaMorph. After  
346 background subtraction, change in fluorescence was measured using the deltaF-up  
347 command in Fiji.

## 348 **Data analysis**

349 **Initial Data Preprocessing:** Raw images obtained were first registered to correct  
350 for any vertical/horizontal movement artifacts using cross correlation. Then, a median  
351 filter of size 3 was applied to remove noise. A darker region outside the region of  
352 interest was chosen as the background and subtracted from the image to remove any  
353 background noise. Non linear trends in the data were detrended using polynomials of  
354 order 2-5. Data was then normalized into Z-scores by subtracting the overall mean and  
355 dividing by the standard deviation. A rolling window average was then used to smooth  
356 noisy traces where necessary. Where possible, cells were segmented or images were  
357 directly analysed as pixels (see Below).

358 **Correlation to light evoked activity:** Temporal traces from pixels (Thalamus or  
359 Thalamic afferents) or segmented cells (in the habenula) were classified as responding

360 to light ON or OFF by calculating their correlation coefficient to a square wave that is 1  
361 when the light is ON or when light is OFF and 0 during other time periods. High  
362 correlation to these traces indicated that the pixel or cell is responding to light ON or  
363 OFF respectively.

364 **Pixel based analysis of the habenula and thalamus:** To show the spatial and  
365 temporal distribution of light evoked activity in the habenula and thalamus, the Thunder  
366 platform (Freeman et al., 2014) was used for fast pixel based clustering and factorization.

367 **PCA:** Principal Component Analysis (PCA) was used to obtain a low dimensional  
368 representation of the population. In normal fish, in the habenula (Figure 1D) and  
369 thalamus (Figure 7M), the first two Principal Components (PC) easily picked up the  
370 evoked responses to light ON and OFF. The explained variance, though small, decayed  
371 rapidly after the first component (Figure 1D, variance explained PC1 12.92%, PC2  
372 6.12% and PC3 4.57%; first 20 PCs 55.60% ; Figure 7M, variance explained PC1  
373 11.87%, PC2 3.61% and PC3 2.67%; first 20 PCs 40.82%) and hence the first two PCs  
374 were chosen to plot the data in low dimension. They showed reproducible state changes  
375 in the population to changes in irradiance. In eye lesioned fish (Figure 7P) however,  
376 neither of the first twenty PCs (variance explained PC1 4.92%, PC2 4.24% and PC3  
377 3.26%; first 20 PCs 39.53%) showed any discernable correlation to light evoked activity  
378 (The inset in Figure 7P). The first two are plotted in Figure 7P for comparison with  
379 controls. Correlation coefficients plotted in insets of Figure 7M and 7P were obtained by  
380 correlating the PCs with a trace that was 1 when light was ON and 0 otherwise.

381 **K-means:** K-means clustering was performed to identify pixels with similar  
382 responses profiles. Given the uncertainty of k-means to the optimal cluster number, an  
383 iterative approach was used to separate pixels relating to evoked responses versus

384 pixels that don't (here referred to as noise clusters). The number of clusters were chosen  
385 to reveal as many stimulus related clusters as possible, until there was little change in  
386 the number and types of stimulus related clusters and increase in noise related clusters.  
387 Noise clusters were then removed from the spatial and temporal plots for clarity. It is to  
388 be noted that this analysis does have its drawbacks when used to analyse data with  
389 variable variance and cannot not capture all possible types of responses. Multiple runs  
390 were made to ensure that noisy pixels were not clustered into evoked clusters. Where  
391 applicable cell segmentation and manual classification was used. For example, we were  
392 not able to separate inhibitory clusters from off custers in Figure 3E-G. This was  
393 revealed when the cells were segmented, and their temporal traces inspected. In all  
394 cases, K-means cluster center showing evoked responses to light ON were colored in  
395 shades of blue and those showing responses to light OFF were colored in shades of red.  
396 Pixels belonging to the cluster were colored similarly and superimposed on an average  
397 image of the plane analysed. In different datasets, on average, this analysis provided an  
398 optimal k of 6-10; 3-4 clusters that didn't correspond to evoked activity were not included  
399 while plotting.

400 For data following eye lesion (Figure 7) and thalamic neuropil/AF9/AF7 lesion  
401 (Figure 9), k-means was performed to differentiate responses between the controls and  
402 the lesion. Hence, number of clusters were chosen such that cluster center adequately  
403 differentiated responses before and after lesion. Cluster center not responding to light  
404 were also plotted here. To verify the results of k-means, the presence of light response  
405 was verified by examining the pixels (Figure 8 Q-S) or segmenting the cells (Figure 9 J-  
406 N) in both control and lesioned animals.

407 The scripts used for analysis are provided at <http://dx.doi.org/10.5061/dryad.q0171>.

408           **Cell segmentation:** Each stack was scaled 2x in imageJ, then maximally  
409 projected to a single image, which was then subjected to a minimum filter and unsharp  
410 mask to sharpen the boundary of cells. ROIs were identified using the “find maxima...”  
411 command, as a way to localize regional darkest point as the center of each ROI. The  
412 boundary of the ROI was outlined by “analyze particle...” that connects bright pixels into  
413 mosaic-like tessellated plane, encircling each darkest point. Each ROI was then  
414 numbered sequentially using the ImageJ ROI Manager and mapped back to the original  
415 despeckled image stack. Manual segmentation was done here to delete extraneous  
416 ROIs outside the habenula and to encircle cells that were not detected by the algorithm  
417 (<10% of total ROIs). In the last step, “Set measurements...” and “measure” in ImageJ  
418 provided the mean fluorescence value of all pixels within each ROI across the entire  
419 image stack and the x-y coordinates of each ROI. Time-lapse series in which z drifting  
420 occurred were excluded, as in this case ROIs could not be defined.

421           **K-means on segmented cells:** For Figures 2D-F, *k-means* was performed from  
422 cells segmented by the semi automated algorithm described above. The purpose is to  
423 determine heterogeneity of temporal responses to changes in irradiance, accurately  
424 classify cells into ON, OFF and Inhibitory responses and perform correlation between  
425 them. Analysis was done on traces from 4986 habenula cells from 6 fish. Traces were  
426 detrended, smoothed and normalized to z-scores using baseline as the time before the  
427 first blue light. Traces that did not reach a Z-score of 2 during the period of irradiance  
428 change were classified as not having an evoked response and not included in the  
429 clustering analysis. 2456 of 4986 cells were thus removed. *K-means* was first run with an  
430 arbitrary  $k = 60$ . This generated a wide range of clusters capturing the temporal  
431 heterogeneity of the responses. The clusters were then divided into ON, OFF, Inhibitory  
432 and no evoked response. Neurons belonging to each cluster were correlated among

433 each other and to the cluster center. If they had an evoked response, they were  
434 correlated with other clusters and assigned to one with the highest correlation. Otherwise  
435 they were classified into the no evoked response category; 138 such cells were  
436 reclassified. Traces of cells belonging to ON, OFF and Inhibitory clusters are plotted as a  
437 heatmap in Figure 2G and their correlation coefficients in Figure 2H. Similarly, cells  
438 segmented from multiple fish were classified to reveal responses in different habenula  
439 regions as plotted in Figure 3H-J.

440 **Boxplots:** Boxplots in Figures 7Q, 8D-E and 9N were plotted to show the full  
441 distribution of the data. The box in the boxplot ranges from the first quartile to the third  
442 quartile, and the box shows the interquartile range (IQR). The line across the box is the  
443 median of the data. The whiskers extend to  $1.5 \times \text{IQR}$  on either side of the box. Anything  
444 above this range are defined as outliers and plotted as black diamonds in the plots.

#### 445 **Neural tracing**

446 DiD (Life Technologies) was dissolved in 50  $\mu\text{l}$  ethanol to make a saturated  
447 solution. This was heated to  $55^\circ\text{C}$  for 5 minutes prior to injection into the fish that had  
448 been fixed in 4% paraformaldehyde. Fish were mounted in 1.2% low melting  
449 temperature agarose dissolved in PBS. The dye was pressure injected into the habenula  
450 under a compound microscope (Leica DM LFS), using a 20X water immersion objective.  
451 For labeling the retina, a saturated solution of Dil in chloroform was used. Injections  
452 were carried out under a stereo microscope (Zeiss Stemi 2000). After injections, fish  
453 were stored at  $4^\circ\text{C}$  overnight to allow tracing, and then imaged with a 40x water  
454 immersion objective on a Zeiss LSM 710 confocal microscope.

## 455 **Antibody label**

456 Larvae were fixed in 4% para-formaldehyde/PBS overnight at 4°C. They were then  
457 rinsed in PBS. The brains were dissected out, and permeabilized using 1% BSA  
458 (fraction V; Sigma), 0.1% DMSO and 0.1% Triton X-100. The antibodies used here, anti-  
459 vGlut1/2 (Synaptic Systems 135503, RRID:AB\_1279466; 1:100) and anti-GAD65/67  
460 (Abcam ab11070, RRID:AB\_297722; 1:500), have previously been used in zebrafish  
461 (Wyart et al., 2009; Lee et al., 2010). The brains were incubated in the primary antibody  
462 overnight, rinsed several times in PBS, then incubated in secondary antibody (Alexa 488  
463 goat anti-rabbit; 1:1000). After washing, these were mounted in 1.2% agarose/PBS.  
464 Imaging was carried out using a Zeiss LSM 510 laser scanning confocal microscope,  
465 with a 40x water immersion objective.

## 466 **Optogenetic stimulation**

467 5 dpf *Tg(s1020GAL4, UAS:ChR2-eYFP, elavl3:GCaMP6f)* larvae were used. The  
468 eyes were removed using fine tungsten needles in fish that were anesthetized with  
469 MS222. This procedure was carried out in Ringers saline. Fish were then mounted in  
470 1.2% agarose in Ringers saline, and imaged using two-photon microscopy as described  
471 above, at 1 Hz. Optical stimulation was carried out using a 50 µm fiber optic probe (Doric  
472 Lenses), placed approximately 20 µm from the thalamus. The 465 nm LED (Doric) was  
473 driven with a current of 900 mA, 30 seconds after the start of imaging. 10 pulses were  
474 provided, with a pulse duration of 25 milliseconds and a frequency between 1 and 8 Hz.  
475 Each fish was exposed to at least 3 pulse trains. For Figure 6B-C, the average of the first  
476 29 frames was used as a reference. The ratio of all frames relative to this reference was  
477 obtained using FIJI. The analysis to generate Figure 6G was blind to the genotype.



478 **Enucleation**

479 5 day-old fish were anaesthetized in Ringer's saline containing MS222. The eyes  
480 were removed using electrolytically sharpened tungsten needles. Fish were allowed to  
481 recover for several hours in anesthetic-free saline. Activity recorded 2 - 4 hours after eye  
482 removal. To enable lateral imaging of the thalamus (Figure 7H-J), one eye was removed  
483 using this method.

484 **Laser ablation**

485 *Tg(Elavl3:GCaMP6f)* larvae were anaesthetized and then mounted in 2% low-  
486 melting temperature agarose. Lesions were created with the femto-second laser tuned to  
487 960 nm and fixed on a single point. Several pulses, each lasting 100 - 500 msec, were  
488 used. Lesioning was monitored by time-lapse imaging before and after each pulse, and  
489 was terminated when there was a localized increase in GCaMP6f fluorescence. The  
490 formation of a bubble indicates that lesioning involved plasma formation (Venugopalan  
491 et al., 2002). These can be imaged in the red channel of the two-photon microscope.  
492 Sample size was chosen based on (Aizenberg and Schuman, 2011). Animals with  
493 bleeding in the brain after lesioning, due to bursting of a blood vessel in the thalamis,  
494 were discarded.

495 **Analysis of the mouse mesoscale connectome**

496 The mouse connectivity atlas (<http://connectivity.brain-map.org/>) was searched in  
497 "Target Search" mode, using "TH" as the source structure and "EPI" as the target  
498 structure. The minimum target volume listed was 0.005 mm<sup>3</sup>. For each hit, serial  
499 transverse sections containing the habenula, which had been imaged by two-photon  
500 microscopy, were screened manually to verify that there were labelled fibers within the

501 habenula.

## 502 **Acknowledgements**

503 This work was funded by core funding from the Institute of Molecular and Cell  
504 Biology and a grant from the Ministry of Education, Singapore. SK and QL were  
505 supported by fellowships from the National University of Singapore. DGCH was  
506 supported by NIH grant 5T32HL007901. We thank Caroline Kibat for technical  
507 assistance and Claire Wyart for providing the *UAS:ChR2-eYFP* transgenic line.

## 508 **Author contributions**

509 Experiments were designed by CRK, QL and SJ. CRK carried out two-photon  
510 imaging. SK developed software and analyzed imaging data. DGCH and IHB generated  
511 the *elav13:GCaMP6f* transgenic line. SJ performed wide-field imaging, analysis, dye  
512 tracing, optogenetic manipulation and wrote the manuscript.

## 513 **References**

- 514 Agetsuma M, Aizawa H, Aoki T, Nakayama R, Takahoko M, Goto M, Sassa T, Amo R,  
515 Shiraki T, Kawakami K, Hosoya T, Higashijima S-I, Okamoto H (2010) The habenula  
516 is crucial for experience-dependent modification of fear responses in zebrafish. *Nat*  
517 *Neurosci* 13:1354–1356.
- 518 Aizawa H, Yanagihara S, Kobayashi M, Niisato K, Takekawa T, Harukuni R, McHugh TJ,  
519 Fukai T, Isomura Y, Okamoto H (2013) The synchronous activity of lateral habenular  
520 neurons is essential for regulating hippocampal theta oscillation. *J Neurosci*  
521 33:8909–8921.
- 522 Aizenberg M, Schuman EM (2011) Cerebellar-Dependent Learning in Larval Zebrafish. *J*  
523 *Neurosci* 31:8708–8712.

- 524 Amo R et al. (2014) The habenulo-raphé serotonergic circuit encodes an aversive  
525 expectation value essential for adaptive active avoidance of danger. *Neuron*  
526 84:1034–1048.
- 527 Appelbaum L, Wang GX, Maro GS, Mori R, Tovin A, Marin W, Yokogawa T, Kawakami K,  
528 Smith SJ, Gothilf Y, Mignot E, Mourrain P (2009) Sleep-wake regulation and  
529 hypocretin-melatonin interaction in zebrafish. *Proceedings of the National Academy*  
530 *of Sciences* 106:21942–21947.
- 531 Arrenberg A, Arrenberg AB, Del Bene F, Del Bene F, Baier H, Baier H (2009) Optical  
532 control of zebrafish behavior with halorhodopsin. *Proceedings of the National*  
533 *Academy of Sciences* 106:17968–17973.
- 534 Aschoff J (1960) Exogenous and endogenous components in circadian rhythms. *Cold*  
535 *Spring Harb Symp Quant Biol* 25:11–28.
- 536 Badia P, Myers B, Boecker M, Culpepper J, Harsh JR (1991) Bright light effects on body  
537 temperature, alertness, EEG and behavior. *Physiol Behav* 50:583–588.
- 538 Burgess HA, Granato M (2007) Modulation of locomotor activity in larval zebrafish during  
539 light adaptation. *J Exp Biol* 210:2526–2539.
- 540 Burgess HA, Schoch H, Granato M (2010) Distinct retinal pathways drive spatial  
541 orientation behaviors in zebrafish navigation. *Curr Biol* 20:381–386.
- 542 Burrill JD, Easter SS (1994) Development of the retinofugal projections in the embryonic  
543 and larval zebrafish (*Brachydanio rerio*). *J Comp Neurol* 346:583–600.
- 544 Butler AB, Saidel WM (2003) Clustered phylogenetic distribution of nucleus  
545 rostromedialis among ray-finned fishes. *Brain Behav Evol* 62:152–167.

- 546 Chen T-W, Wardill TJ, Sun Y, Pulver SR, Renninger SL, Baohan A, Schreiter ER, Kerr  
547 RA, Orger MB, Jayaraman V, Looger LL, Svoboda K, Kim DS (2013) Ultrasensitive  
548 fluorescent proteins for imaging neuronal activity. *Nature* 499:295–300.
- 549 Cheng R-K, Krishnan S, Jesuthasan S (2016) Activation and inhibition of tph2  
550 serotonergic neurons operate in tandem to influence larval zebrafish preference for  
551 light over darkness. *Sci Rep* 6:20788.
- 552 Chou M-Y, Amo R, Kinoshita M, Cherng B-W, Shimazaki H, Agetsuma M, Shiraki T, Aoki  
553 T, Takahoko M, Yamazaki M, Higashijima S-I, Okamoto H (2016) Social conflict  
554 resolution regulated by two dorsal habenular subregions in zebrafish. *Science*  
555 352:87–90.
- 556 Cragg BG (1961) The connections of the habenula in the rabbit. *Exp Neurol* 3:388–409.
- 557 deCarvalho TN, Subedi A, Rock J, Harfe BD, Thisse C, Thisse B, Halpern ME, Hong E  
558 (2014) Neurotransmitter map of the asymmetric dorsal habenular nuclei of zebrafish.  
559 *Genesis* 52:636–655.
- 560 Díaz C, Puelles L (1992) Afferent connections of the habenular complex in the lizard  
561 *Gallotia galloti*. *Brain Behav Evol*.
- 562 Dreosti E, Vendrell-Llopis N, Carl M, Yaksi E, Wilson SW (2014) Left-right asymmetry is  
563 required for the habenulae to respond to both visual and olfactory stimuli. *Curr Biol*  
564 24:440–445.
- 565 Fernandes AM, Fero K, Driever W, Burgess HA (2013) Enlightening the brain: Linking  
566 deep brain photoreception with behavior and physiology. *Bioessays* 35:775–779.
- 567 Fite KV, Wu PS, Bellemer A (2005) Photostimulation alters c-Fos expression in the

- 568 dorsal raphe nucleus. *Brain Res* 1031:245–252.
- 569 Fowler CD, Lu Q, Johnson PM, Marks MJ, Kenny PJ (2011) Habenular  $\alpha 5$  nicotinic  
570 receptor subunit signalling controls nicotine intake. *Nature* 471:597–601.
- 571 Golden SA et al. (2016) Basal forebrain projections to the lateral habenula modulate  
572 aggression reward. *Nature* 534:688–692.
- 573 Hattar S, Kumar M, Park A, Tong P, Tung J, Yau K-W, Berson DM (2006) Central  
574 projections of melanopsin-expressing retinal ganglion cells in the mouse. *J Comp*  
575 *Neurol* 497:326–349.
- 576 Hendricks M, Jesuthasan S (2007) Asymmetric innervation of the habenula in zebrafish.  
577 *J Comp Neurol* 502:611–619.
- 578 Higashijima S-I, Masino MA, Mandel G, Fetcho JR (2003) Imaging neuronal activity  
579 during zebrafish behavior with a genetically encoded calcium indicator. *J*  
580 *Neurophysiol* 90:3986–3997.
- 581 Hong S, Hikosaka O (2008) The globus pallidus sends reward-related signals to the  
582 lateral habenula. *Neuron* 60:720–729.
- 583 Jhou TC, Fields HL, Baxter MG, Saper CB, Holland PC (2009) The rostromedial  
584 tegmental nucleus (RMTg), a GABAergic afferent to midbrain dopamine neurons,  
585 encodes aversive stimuli and inhibits motor responses. *Neuron* 61:786–800.
- 586 Krishnan S, Mathuru AS, Kibat C, Rahman M, Lupton CE, Stewart J, Claridge-Chang A,  
587 Yen S-C, Jesuthasan S (2014) The Right Dorsal Habenula Limits Attraction to an  
588 Odor in Zebrafish. *Curr Biol*.

- 589 Lee A, Mathuru AS, Teh C, Kibat C, Korzh V, Penney TB, Jesuthasan S (2010) The  
590 habenula prevents helpless behavior in larval zebrafish. *Curr Biol* 20:2211–2216.
- 591 LeGates TA, Altimus CM, Wang H, Lee H-K, Yang S, Zhao H, Kirkwood A, Weber ET,  
592 Hattar S (2012) Aberrant light directly impairs mood and learning through  
593 melanopsin-expressing neurons. *Nature* 491:594–598.
- 594 Marburg O (1944) The structure and fiber connections of the human habenula. *Journal*  
595 *of Comparative Neurology* 80:211–233.
- 596 Matos-Cruz V, Blasic J, Nickle B, Robinson PR, Hattar S, Halpern ME (2011)  
597 Unexpected diversity and photoperiod dependence of the zebrafish melanopsin  
598 system. *PLoS ONE* 6:e25111.
- 599 Matsumoto M, Hikosaka O (2007) Lateral habenula as a source of negative reward  
600 signals in dopamine neurons. *Nature* 447:1111–1115.
- 601 Matsumoto M, Hikosaka O (2009) Representation of negative motivational value in the  
602 primate lateral habenula. *Nat Neurosci* 12:77–84.
- 603 Miyasaka N, Morimoto K, Tsubokawa T, Higashijima S-I, Okamoto H, Yoshihara Y  
604 (2009) From the olfactory bulb to higher brain centers: genetic visualization of  
605 secondary olfactory pathways in zebrafish. *J Neurosci* 29:4756–4767.
- 606 Moore RY, Weis R, Moga MM (2000) Efferent projections of the intergeniculate leaflet  
607 and the ventral lateral geniculate nucleus in the rat. *J Comp Neurol* 420:398–418.
- 608 Morley BJ, Spangler KM, Javel E (1985) The development of somatostatin  
609 immunoreactivity in the interpeduncular nucleus of the cat. *Brain Res* 352:241–248.

- 610 Mueller T (2012) What is the Thalamus in Zebrafish? *Front Neurosci* 6:64.
- 611 Oh SW et al. (2014) A mesoscale connectome of the mouse brain. *Nature* 508:207–214.
- 612 Quina LA, Tempest L, Ng L, Harris JA, Ferguson S, Jhou TC, Turner EE (2014) Efferent  
613 Pathways of the Mouse Lateral Habenula. *J Comp Neurol*.
- 614 Robles E, Laurell E, Baier H (2014) The retinal projectome reveals brain-area-specific  
615 visual representations generated by ganglion cell diversity. *Curr Biol* 24:2085–2096.
- 616 Saidel WM (2013) Nucleus Rostrolateralis: An Expansion of the Epithalamus in Some  
617 Actinopterygii. *The Anatomical Record* 296:1594–1602.
- 618 Satou C, Kimura Y, Hirata H, Suster ML, Kawakami K, Higashijima S-I (2013)  
619 Transgenic tools to characterize neuronal properties of discrete populations of  
620 zebrafish neurons. *Development* 140:3927–3931.
- 621 Semm P, Demaine C (1984) Electrophysiology of the pigeon's habenular nuclei:  
622 evidence for pineal connections and input from the visual system. *Brain Res Bull*  
623 12:115–121.
- 624 Semmelhack JL, Donovan JC, Thiele TR, Kuehn E, Laurell E, Baier H (2014) A  
625 dedicated visual pathway for prey detection in larval zebrafish. *Elife* 3:17968.
- 626 Stephenson-Jones M, Floros O, Robertson B, Grillner S (2012) Evolutionary  
627 conservation of the habenular nuclei and their circuitry controlling the dopamine and  
628 5-hydroxytryptophan (5-HT) systems. *Proc Natl Acad Sci USA* 109:E164–E173.
- 629 Thornton EW, Davies C (1991) A water-maze discrimination learning deficit in the rat  
630 following lesion of the habenula. *Physiol Behav* 49:819–822.

- 631 Torrisi S, Nord CL, Balderston NL, Roiser JP, Grillon C, Ernst M (2016) Resting State  
632 Connectivity of the Human Habenula at Ultra-High Field. *Neuroimage*:1–21.
- 633 Turner KJ, Hawkins TA, Yáñez J, Anadón R, Wilson SW, Folgueira M (2016) Afferent  
634 Connectivity of the Zebrafish Habenulae. *Front Neural Circuits* 10:3512.
- 635 Vandewalle G, Schwartz S, Grandjean D, Wuillaume C, Balteau E, Degueldre C,  
636 Schabus M, Phillips C, Luxen A, Dijk DJ, Maquet P (2010) Spectral quality of light  
637 modulates emotional brain responses in humans. *Proceedings of the National  
638 Academy of Sciences* 107:19549–19554.
- 639 Venugopalan V, Guerra A, Nahen K, Vogel A (2002) Role of Laser-Induced Plasma  
640 Formation in Pulsed Cellular Microsurgery and Micromanipulation. *Phys Rev Lett*  
641 88:078103.
- 642 Wang RY, Aghajanian GK (1977) Physiological evidence for habenula as major link  
643 between forebrain and midbrain raphe. *Science* 197:89–91.
- 644 Wyart C, Del Bene F, Warp E, Scott EK, Trauner D, Baier H, Isacoff EY (2009)  
645 Optogenetic dissection of a behavioural module in the vertebrate spinal cord. *Nature*  
646 461:407–410.
- 647 Yáñez J, Busch J, Anadón R, Meissl H (2009) Pineal projections in the zebrafish (*Danio*  
648 *rerio*): overlap with retinal and cerebellar projections. *Neuroscience* 164:1712–1720.
- 649 Yañez J, Anadon R (1994) Afferent and efferent connections of the habenula in the  
650 larval sea lamprey (*Petromyzon marinus* L.): an experimental study. *J Comp Neurol*  
651 345:148–160.
- 652 Zhang J, Tan L, Ren Y, Liang J, Lin R, Feng Q, Zhou J, Hu F, Ren J, Wei C, Yu T,



653        Zhuang Y, Bettler B, Wang F, Luo M (2016) Presynaptic Excitation via GABAB  
654        Receptors in Habenula Cholinergic Neurons Regulates Fear Memory Expression.  
655        Cell 166:716–728.

656        Zhao H, Rusak B (2005) Circadian firing-rate rhythms and light responses of rat  
657        habenular nucleus neurons in vivo and in vitro. Neuroscience 132:519–528.

## 658        **Figure legends**

659        **Figure 1. The larval zebrafish habenula has a broad and complex response to**  
660        **change in irradiance.** (A) Dorsal view of the head of a live 7 day-old fish, with GCaMP3  
661        expression in the habenula (arrows) under the control of the *s1011t* GAL4 driver. (B) A  
662        single two-photon slice through the dorsal habenula of the fish in panel A (boxed region).  
663        (C) A yz reconstruction at the point indicated by the yellow line in panel B, showing a  
664        transverse view of the habenula. The dotted lines indicate imaging planes separated by  
665        10  $\mu\text{m}$ . The yellow line indicates the plane imaged in B. Dashed lines show the border  
666        of the habenula. (D) Spatial distribution of responses in the habenula of one fish (7 dpf)  
667        to pulses of light. 5 planes are shown here. The colors are coded according to the  
668        temporal pattern of response, as indicated in (E). Images were collected at a rate of 1  
669        stack/second, and four pulses of light were delivered for 20 seconds each, with variable  
670        inter-stimulus interval. (E) Centers of *k*-means clusters corresponding to colors of pixels  
671        in (D). Cluster centers in (D) and the corresponding pixels in (E) indicating responses to  
672        light ON are colored in shades of blue and light OFF in shades of red. The horizontal  
673        black line represents Z-score of 0. (F) Trajectory of the habenula response in two-  
674        dimensional state space, using the first two principal components (PC1 and PC2).  
675        Traces are color-coded according to the wedges in panel E, to represent direction in  
676        which change in irradiance drives the neural state. In panels E and F, the bold lines  
677        correspond to light onset while the dashed lines indicate offset. The presence of light is

678 also indicated by the blue bars. IHb: left habenula; rHb: right habenula. a: anterior; p:  
679 posterior. d: dorsal; v: ventral Scale bar = 100  $\mu\text{m}$  in panel A, 25  $\mu\text{m}$  elsewhere.

680 **Figure 2. Habenula response to irradiance change is reproducible.** (A-C)

681 Segmentation of habenula neurons using a semi-automated algorithm (see Methods).

682 (D-F) *K*-means cluster analysis of segmented habenula neuron responses to pulses of

683 blue light in 6 fish (7-8 dpf). Traces show cluster center, with shaded regions indicating

684 standard error of the mean. Clusters were grouped by their temporal activity pattern and

685 clusters with excitation to light ON (D) or OFF (E), or inhibition to light (Inhibitory, F) were

686 seen. Clusters without evoked responses are not shown. (G) Activity traces of each cell

687 from the 6 fish grouped into ON, OFF and Inhibitory (Inh) categories based on their

688 membership to the clusters shown in D-F. Horizontal black lines divide the categories.

689 (H) Correlation between activity of cells belonging to ON, OFF and Inhibitory (Inh)

690 clusters shown in D-F. In general, the ON and OFF responding cells were uncorrelated

691 (correlation coefficient  $< 0$ ). Vertical and horizontal black lines divide ON, OFF and

692 Inhibitory categories. (I) Activity traces of cells in ON and OFF clusters that showed high

693 correlation with the other category (313 of 1767 cells). The traces showed that this

694 correlation may be due to OFF cells showing slow decay in fluorescence following light

695 ON. Manual inspection of the traces did not reveal any cells that responded reliably to

696 both light ON and OFF. Colorbar for panels G and I is shown below panel I. Scale bar =

697 25  $\mu\text{m}$ .

698 **Figure 3. The response of different habenula subdomains to change in irradiance.**

699 (A-C) A *narp:GAL4, UAS:DsRed, Brn3a:eGFP* larva, with label in the dorsal habenula

700 (arrows) and projection to the IPN (arrowhead). A coronal (B) and reconstructed sagittal

701 (C) section through the left habenula, with dHbM in green and dHbL in magenta. (D)

702 Spatial distribution of responses in the dorsal habenula of a *narp:GAL4, UAS:GCaMP6s*

703 fish (8dpf). (E). Responses of non-DsRed cells in the dorsal habenula of a  
704 *elavl3:GCaMP6f, narp:GAL4, UAS:DsRed* fish (6dpf). (F) Responses in the ventral  
705 habenula of a *dao:GAL4, UAS:GCaMP6s* fish (6dpf). Pixels in panels D-F are coloured  
706 by their membership to *k*-means cluster centers. (G) Cluster centers obtained from  
707 running *k*-means on data in D-F. (H-J) Heatmaps plotting temporal traces from  
708 segmented cells in dHbL (H; *n* = 5 fish), dHbM (I; *n* = 5 fish) and vHb (J; *n* = 8 fish). The  
709 cells are sorted into ON, OFF and Inhibitory categories that are separated by a  
710 horizontal black line. Mean traces of each category are plotted below the heatmaps. (K-  
711 L) Activity in axons of habenula neurons innervating the interpeduncular nucleus, in a  
712 *s1011tGAL4, UAS:GCaMP3* fish. Four different planes are shown, in lateral view. All  
713 domains show evoked activity, and responses appear to be organized according to  
714 region. Pixels are colour-coded according to the *k*-means clusters (L). In G-J and L, blue  
715 bars indicate the presence of light and vertical bold lines correspond to light onset while  
716 the dashed lines indicate light offset. a: anterior, p: posterior; l: lateral, m: medial. Scale  
717 bar = 25  $\mu$ m.

718 **Figure 4. Spatio-temporal characterization of light-evoked activity using high**  
719 **speed imaging.** (A-F) Widefield imaging at 200 Hz. (A) Average of all frames in the  
720 time-lapse, to show morphology. This is a dorsal view of a 5 day old fish *elavl3:CaMP6f*  
721 fish. The habenula has been outlined in black. (B-F) Change in fluorescence relative to  
722 the preceding frame. An increase in fluorescence is seen in the thalamus (arrows) and in  
723 the left habenula (arrowhead). (G-I) Two photon imaging of the habenula in a  
724 *s1011tGAL4, UAS:GCaMP6s* fish, at 13 Hz. (G) Average of the time-lapse sequence,  
725 showing anatomy. The neuropil is indicated by the arrowhead. (H) Responses to pulses  
726 of light. Pixels are color-coded according to the traces in panel I. rHb: right habenula;  
727 lHb: left habenula. Panels A-E were smoothed using Gaussian blur with  $\sigma = 1.7$ .

728 The time indicated is time since start of illumination with the excitation blue LED.

729 **Figure 5. The thalamus projection to the habenula.** (A) Dorsal view of the forebrain of  
730 a *Et(SqKR11)* larva, in which habenula afferents from the entopeduncular nucleus are  
731 labeled. The dorsal left neuropil (arrow) is weakly labeled. (B) Dorsal view of the  
732 habenula of a *Et(SqKR11)* larva, following DiD injection into the dorsal neuropil of the left  
733 habenula. The parapineal (arrow) has been retrogradely labeled. Habenula afferents  
734 from the entopeduncular nucleus are labeled in red. (C) 80  $\mu\text{m}$  deeper in the same fish,  
735 showing label in the thalamus (white arrows). (D) Lateral view of another larva, in which  
736 the dorsal left neuropil had been injected with DiD. The retrogradely labeled thalamic  
737 neuropil is indicated (white arrow). The entopeduncular nucleus is indicated by the  
738 yellow arrow. The inset shows a higher magnification labeled thalamic neuropil. Cell  
739 bodies are labeled (white arrowhead). (E) A close up view of the neuropil retrogradely  
740 labeled by DiD (cyan), in a fish where retinal ganglion cells had been labeled with Dil  
741 (yellow). RGC terminals intermingle with fibers from DiD-labeled cells innervating the  
742 neuropil (arrow). The arrowhead indicates a thalamic neuron labeled retrogradely with  
743 DiD. (F, G) Dorsal view of the thalamus (F) and habenula (G) of a fish expressing Kaede  
744 (red) under the control of the *GAL4s1020t* driver. Labelled cells are visible in the  
745 thalamus (F, white arrowheads). Labelled neurites are visible in the thalamic neuropil (F,  
746 yellow arrowheads) and in the habenula neuropils (G, arrowheads). GCaMP6f (green) is  
747 broadly expressed in this fish. (H) Dorsal view of a 6-day-old fish, labeled with an anti-  
748 vGlut1/2 antibody, which marks glutamatergic pre-synapses. All neuropils, including the  
749 dorsal left (arrowhead), are labelled. (I) Dorsal view showing label with an anti-  
750 GAD65/67 antibody. Labeled puncta are visible in the habenula neuropil (arrowhead).  
751 No labeled cell bodies were detected in the habenula. (J) A *gad1b:RFP*, *vGlut2:GAL4*,  
752 *UAS:eGFP* fish, with GABAergic cells indicated in magenta and glutamatergic cells

753 shown in green. Both cell types can be detected in the thalamus. The arrowhead  
754 indicates the neuropil of the putative nucleus rostromedialis. (K) RFP expression in the  
755 thalamus of a *gad1b:RFP* fish. Arrowheads indicate neurites extending to the neuropil of  
756 the putative nucleus rostromedialis. All panels except (A) and (H) are single optical  
757 sections. Pa: pallidum; rHb: right habenula; lHb: left habenula; Th: thalamus. EN:  
758 entopeduncular nucleus; OT: optic tectum; \*: auto-fluorescing pigment cell. Scale bar =  
759 25  $\mu$ m. Anterior is to the left in all cases.

760 **Figure 6. Optogenetic stimulation of the thalamus triggers habenula activity.** (A)  
761 Expression of ChR2-eYFP in the thalamus (arrowheads) of a 5 day old *s1020tGAL4*,  
762 *UAS:ChR2-eYFP*, *elavl3:GCaMP6f* fish. (B, C) Activity in the habenula of a ChR2-  
763 expressing fish, with (B) and without (C) blue LED stimulation of the thalamus. The  
764 images show the maximum projections of  $F/F_0$  images for a 25-second period after blue  
765 LED illumination, following subtraction of maximum projections of the period before  
766 illumination (i.e. difference in activity before and after stimulation). (D-F) Heatmaps  
767 showing temporal activity from habenula neurons segmented in fish with (D, E) and  
768 without (F) ChR2. In D (n = 5 fish) and F (n = 2 fish), blue light pulse was given at the  
769 time indicated by the black dashed line. No blue light stimulation was given in E (n = 4  
770 fish). Z-scores were calculated by subtracting each time traces by the total mean and  
771 dividing by the standard deviation. (G) Mean amplitude of z-scores before and after  
772 optogenetic stimulation. Each square stands for a stimulus trial. Amplitude difference  
773 before and after stimulation in ChR2-expressing fish: mean  $\pm$  95% CI: 1 Hz:  $0.43 \pm 0.56$ ,  
774 2 Hz:  $0.72 \pm 0.35$ , 4 Hz:  $0.89 \pm 0.28$  and 8 Hz :  $1.05 \pm 0.18$ ; in siblings:  $0.21 \pm 0.51$ .  
775 Scale bar = 25  $\mu$ m.

776 **Figure 7. Light-evoked activity in the thalamus.** (A-E) Evoked activity in five different  
777 focal planes, from dorsal to ventral, of a 5-day-old fish expressing GCaMP6s in thalamic

778 neurons. Responses are seen in cell bodies (arrows) and in the thalamic neuropil  
779 (arrowheads). The colours represent k-means cluster center (F). (G-J) Lateral view of  
780 light-evoked activity in the thalamus. (G) The region imaged. (H) Average projection of a  
781 lateral view of an *elav13:GCaMP6f* fish, showing the thalamic neuropil (arrowhead).  
782 (I) The response in this fish to four pulses of blue light. Pixels are colored according to  
783 the k-means cluster center (J). (K-P) The effect of eye removal on light-evoked activity in  
784 the thalamus. (K-M) Response in a control (K-M) and eye lesioned fish (N-P), color-  
785 coded according to the k-means cluster centers in (L) and (O) respectively. (M, P)  
786 Trajectory of the thalamic response using the first two principal components (PC1 and  
787 PC2) in control (M) and lesioned (P) fish, colored according to the wedges in panels L  
788 and O to indicate the direction of the trajectories in Principal Component space following  
789 light ON and OFF. Controls, but not lesioned fish, show a reproducible response to light.  
790 Insets in M and P show the correlation coefficient (CC) of the first 20 PCs with a trace  
791 mimicking light evoked activity (see Methods). Unlike controls, the top 20 PCs in the eye  
792 lesioned fish showed weak correlation and did not pick up any light evoked response.  
793 (Q) Correlation coefficients between response of each thalamic pixel and a trace  
794 mimicking response to blue light in multiple *s1020tGAL4, UAS:GCamp6s* fish. All  
795 positive correlation coefficients are plotted here. Each boxplot represents one fish. The  
796 black diamonds are outliers (see Methods). (R-S) Heatmaps showing the number of  
797 pixels with correlation coefficient > 0.5 in control (R) and fish lacking eyes (S). Traces  
798 below show the mean of all the pixels (black traces) and standard error of mean (shaded  
799 region). In panels F, J, L, O and R-S, light onset is indicated by the solid line, while light  
800 offset is indicated by the dashed line. Presence of light is indicated by the blue bars. a:  
801 anterior; p: posterior; d:dorsal, v: ventral. Th: thalamus; Hb:habenula. PC: Principal  
802 component, PC1: First principal component, PC2: Second principal component, CC:  
803 Correlation Coefficient. Scale bar = 25  $\mu$ m. The drawing in panel G was obtained from

804 [www.uoneuro.uoregon.edu](http://www.uoneuro.uoregon.edu)

805

806 **Figure 8. Asymmetric light-evoked activity in thalamic axon terminals in the dorsal**

807 **habenula.** (A) Standard deviation projection of a time-series recording of the dorsal

808 habenula of a 6-day-old *s1020tGAL4,UAS:GCaMP6s* fish. The bright pixels are those

809 with large change in activity. The surrounding skin, which was auto-fluorescent, has

810 been masked. The dorsal left neuropil is indicated with a yellow arrowhead while the

811 dorsal right neuropil is indicated with a green arrowhead. Habenula neurons are dimly

812 auto-fluorescent. (B) Pixels within the dorsal neuropils with activity above 1 standard

813 deviation, colour-coded yellow for left habenula and green for right habenula. This

814 criteria included all terminals in the neuropils. (C) Pixels colour-coded according to

815 whether they responded to light ON (cyan) or OFF (magenta). A relatively large

816 proportion of pixels in the left neuropil responded, compared to the right (compare C with

817 B). Pixels were selected by correlating their activity to a square wave form that was 1

818 during light ON (for ON pixels) and 1 during light OFF (for OFF pixels). Pixels with

819 correlation coefficient greater than 0.5 were selected. (D-I) Analysis of multiple fish

820 ( $n=7$ ). (D) Boxplot of total number of pixels present in the left and right habenula. The

821 number of terminals in left and right habenula were comparable across fish. (E) Number

822 of terminals responding to light ON or light OFF. In D and E, each circle represent data

823 from a single fish. p-value was obtained using non parametric paired Wilcoxon signed

824 rank test. W is sum of the ranks, Z is the test statistic, and r is the effect size. (F-G) Heat

825 maps of activity from all fish, in all thresholded pixels in the left habenula (F), the right

826 habenula (G), and in pixels corresponding to light ON (H) and light OFF (I). Each line

827 corresponds to a single pixel. Panels below show the average of the heat maps above.

828 The shaded region is standard error of mean. Blue boxes indicate when light was

829 delivered. Light onset is indicated by the solid line, while light offset is indicated by the

830 dashed line. Anterior is to the top in panels A-C. Scale bar = 25  $\mu$ m.

831

832 **Figure 9. The effect of lesioning the thalamus on habenula response to light.** (A-C)

833 Dorsal view of an 8-day-old *elavl3:GCaMP6f* fish, showing neural responses before (A)

834 and after (C) lesioning the region of the thalamic neuropil that responds to light (yellow

835 arrowheads in panel A). Pixels in panels A and C are colored according to their activity,

836 as indicated by traces in panel B. The prominent sustained response to light (cyan

837 pixels) is reduced after lesion. (D) The extent of lesion, shown in magenta. (E-G)

838 Habenula activity before (E) and after (G) lesion of the thalamic neuropil. Pixels are

839 colored according to the traces in (F). There is a reduction in the sustained response to

840 light, but some activity that is not stimulus-locked can be seen. (H) The habenula after

841 lesion of AF9, with pixels colored according to the traces in panel (I). (J-M) Heatmaps

842 showing activity in segmented cells before (J) and after (K) AF9 lesion, and before (L)

843 and after (M) thalamic neuropil lesion in one fish. Panels below show mean (black trace)

844 and standard error of mean (shaded region). Light evoked activity is missing following

845 this lesion. (N) Boxplot showing number of cells in one plane of the dorsal left habenula

846 that are excited by blue light, following lesion of the thalamic neuropil ( $n = 12$  fish), or

847 AF7 ( $n = 2$  fish) or AF9 ( $n = 3$  fish), or before lesion ( $n = 5$  fish). P-value was obtained

848 using non parametric Wilcoxon rank sum test. Z is the test statistic, and r is the effect

849 size. The statistical comparisons were made between before lesion and after lesion. a:

850 anterior; p: posterior; Pa: pallium; rHb: right habenula. Images are all single optical

851 sections. Scale bar = 25  $\mu$ m.

852

853 **Figure 10. A potential projection from the ventral lateral geniculate nucleus to the**

854 **habenula in mouse.** Anterograde label was performed by injecting recombinant adeno

855 associated virus into the ventral lateral geniculate nucleus (Oh et al., 2014).  $0.33 \text{ mm}^3$



856 was injected into Bregma (-2.46, 2.6, 2.36, 0) of a p56 slc32a1-IRES-Cre mouse, which  
857 expresses Cre in GABAergic neurons. (A) Coronal view, showing an overview of the  
858 label. (B) A high magnification of the area boxed in panel A, showing labeled fibers in the  
859 habenula. mHb: medial habenula. These images are from [http://connectivity.brain-](http://connectivity.brain-map.org/projection/experiment/siv/267538006?imageId=267538231&imageType=TWO_PHOTON,SEGMENTATION&initImage=TWO_PHOTON&x=14704&y=7847&z=3)  
860 [map.org/projection/experiment/siv/267538006?imageId=267538231&imageType=TWO\\_](http://connectivity.brain-map.org/projection/experiment/siv/267538006?imageId=267538231&imageType=TWO_PHOTON,SEGMENTATION&initImage=TWO_PHOTON&x=14704&y=7847&z=3)  
861 [PHOTON,SEGMENTATION&initImage=TWO\\_PHOTON&x=14704&y=7847&z=3](http://connectivity.brain-map.org/projection/experiment/siv/267538006?imageId=267538231&imageType=TWO_PHOTON,SEGMENTATION&initImage=TWO_PHOTON&x=14704&y=7847&z=3).

862 **Movie 1. Habenula neurons do not project to the thalamus.** 3D rendition of habenula  
863 projection in a zebrafish larva, visualized by expression of RFP under the *narp* promoter  
864 (red) and eGFP under the *brn3a* promoter (green). There is a clear projection to the  
865 interpeduncular nucleus (IPN), but not to the thalamus.

866 **Movie2. Thalamic neurons project to the habenula.** Z-stack of a *s1020t:GAL4, UAS:*  
867 *Kaede, elavl3:GCaMP6f* fish. Thalamic neurons are shown in red, and they can be seen  
868 to project to the neuropils of the habenula. Red label also appears in streaks in the  
869 lateral habenula. Anterior is to the top.

870 **Movie 3. GAD65/67 label in a zebrafish larva.** z-stack of a *s1011t:GAL4,*  
871 *UAS:GCaMP3* transgenic fish, after immuno-labelling with an antibody to GAD65/67  
872 (magenta). The stack goes from dorsal to ventral. GAD65/67 label is visible in neuropils  
873 of the habenula; puncta can be seen between cells in the lateral regions of the habenula  
874 in more ventral planes. GAD65/67 labeled cells are visible in the deep focal planes, but  
875 these do not express GCaMP3. The location of GAD65/67 expressing cells correlates  
876 with the thalamus. S1011Et drives GAL4 expression in the habenula, medial pallium and  
877 anterior-lateral pallium. This is a dorsal view, with anterior to the left.

878 **Movie 4. Z-stack of 6 day old *gad1b:RFP, elavl3:GCaMP6f* fish.** GABAergic neurons  
879 (magenta) are visible in the thalamus, below the habenula. Anterior is to the left. The

880 stack goes from dorsal to ventral.

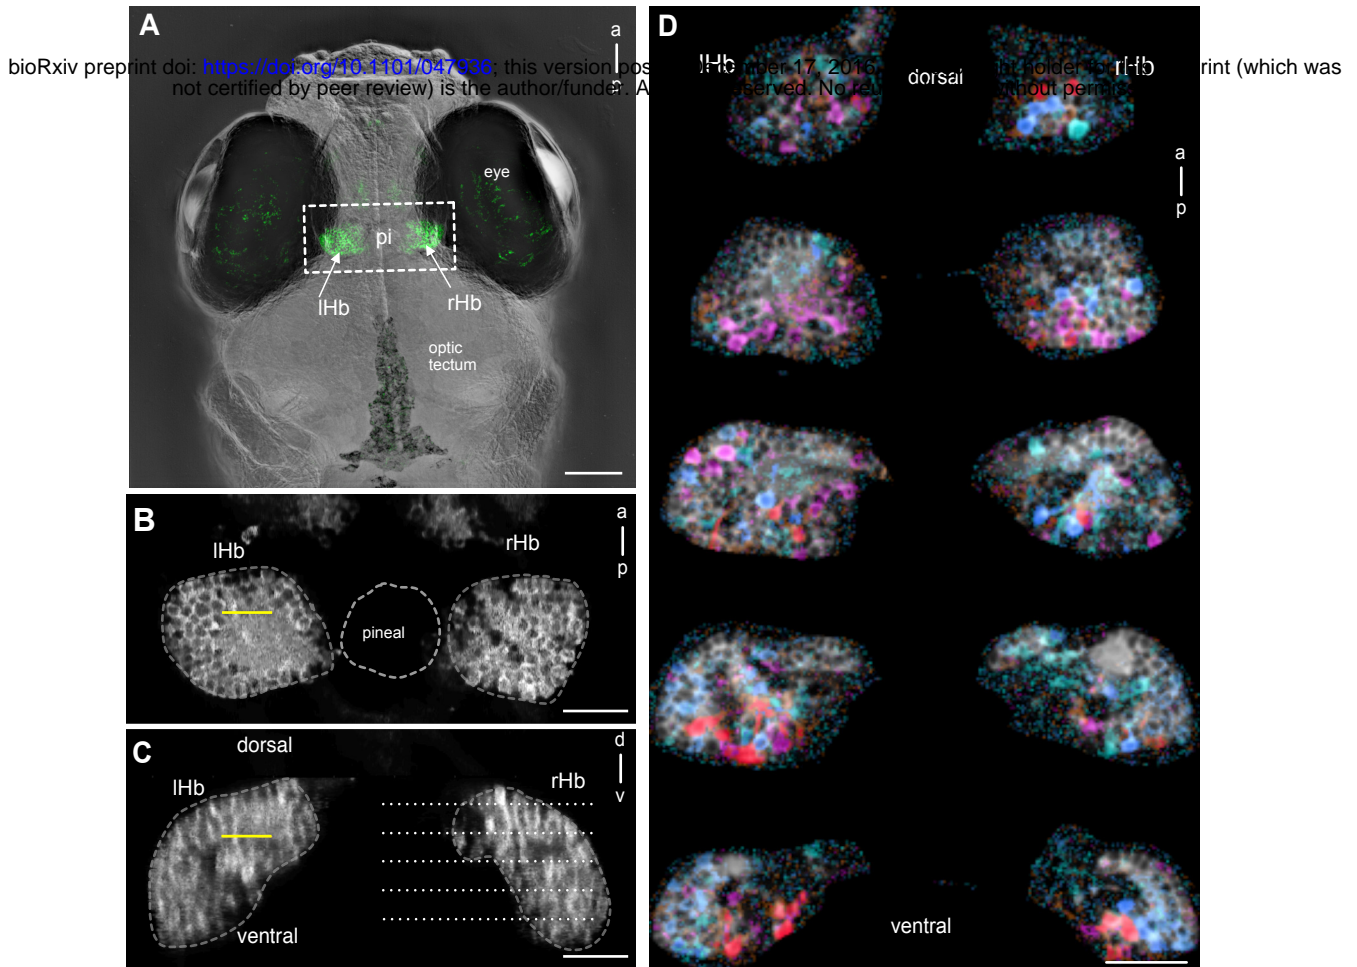

**Figure 1. The larval zebrafish habenula has a broad and complex response to change in irradiance.** (A) Dorsal view of the head of a live 7 day-old fish, with GCaMP3 expression in the habenula (arrows) under the control of the s1011t GAL4 driver. (B) A single two-photon slice through the dorsal habenula of the fish in panel A (boxed region). (C) A yz reconstruction at the point indicated by the yellow line in panel B, showing a transverse view of the habenula. The dotted lines indicate imaging planes separated by 10  $\mu$ m. The yellow line indicates the plane imaged in B. Dashed lines show the border of the habenula. (D) Spatial distribution of responses in the habenula of one fish (7 dpf) to pulses of light. 5 planes are shown here. The colors are coded according to the temporal pattern of response, as indicated in (E). Images were collected at a rate of 1 stack/second, and four pulses of light were delivered for 20 seconds each, with variable inter-stimulus interval. (E) Centers of k-means clusters corresponding to colors of pixels in (D). Cluster centers in (D) and the corresponding pixels in (E) indicating responses to light ON are colored in shades of blue and light OFF in shades of red. The horizontal black line represents Z-score of 0. (F) Trajectory of the habenula response in two-dimensional state space, using the first two principal components (PC1 and PC2). Traces are color-coded according to the wedges in panel E, to represent direction in which change in irradiance drives the neural state. In panels E and F, the bold lines correspond to light onset while the dashed lines indicate offset. The presence of light is also indicated by the blue bars. lHb: left habenula; rHb: right habenula. a: anterior; p: posterior. d: dorsal; v: ventral Scale bar = 100  $\mu$ m in panel A, 25  $\mu$ m elsewhere.

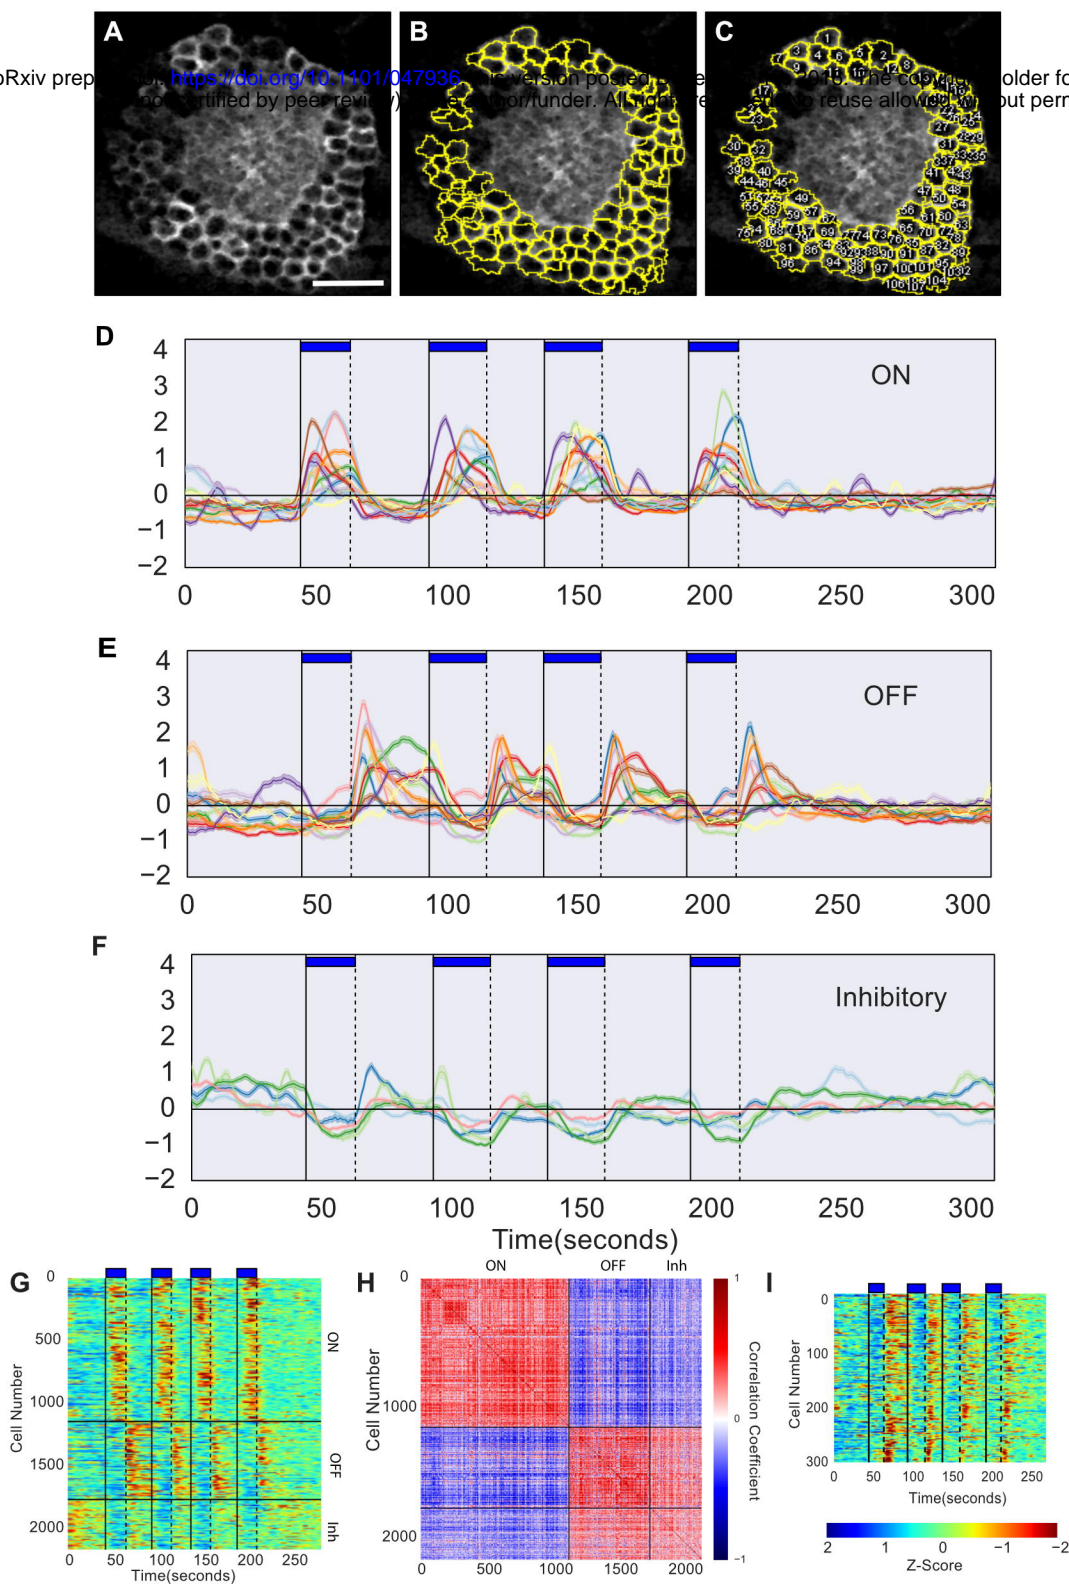

**Figure 2. Habenula response to irradiance change is reproducible.** (A-C) Segmentation of habenula neurons using a semi-automated algorithm (see Methods). (D-F) K-means cluster analysis of segmented habenula neuron responses to pulses of blue light in 6 fish (7-8 dpf). Traces show cluster centroids, with shaded regions indicating standard error of the mean. Clusters were grouped by their temporal activity pattern and clusters with excitation to light ON (D) or OFF (E), or inhibition to light (Inhibitory, F) were seen. Clusters without evoked responses are not shown. (G) Activity traces of each cell from the 6 fish grouped into ON, OFF and Inhibitory (Inh) categories based on their membership to the clusters shown in D-F. Horizontal black lines divide the categories. (H) Correlation between activity of cells belonging to ON, OFF and Inhibitory (Inh) clusters shown in D-F. In general, the ON and OFF responding cells were uncorrelated (correlation coefficient  $< 0$ ). Vertical and horizontal black lines divide ON, OFF and Inhibitory categories. (I) Activity traces of cells in ON and OFF clusters that showed high correlation with the other category (313 of 1767 cells). The traces showed that this correlation may be due to OFF cells showing slow decay in fluorescence following light ON. Manual inspection of the traces did not reveal any cells that responded reliably to both light ON and OFF. Colorbar for panels G and I is shown below panel I. Scale bar = 25  $\mu\text{m}$ .



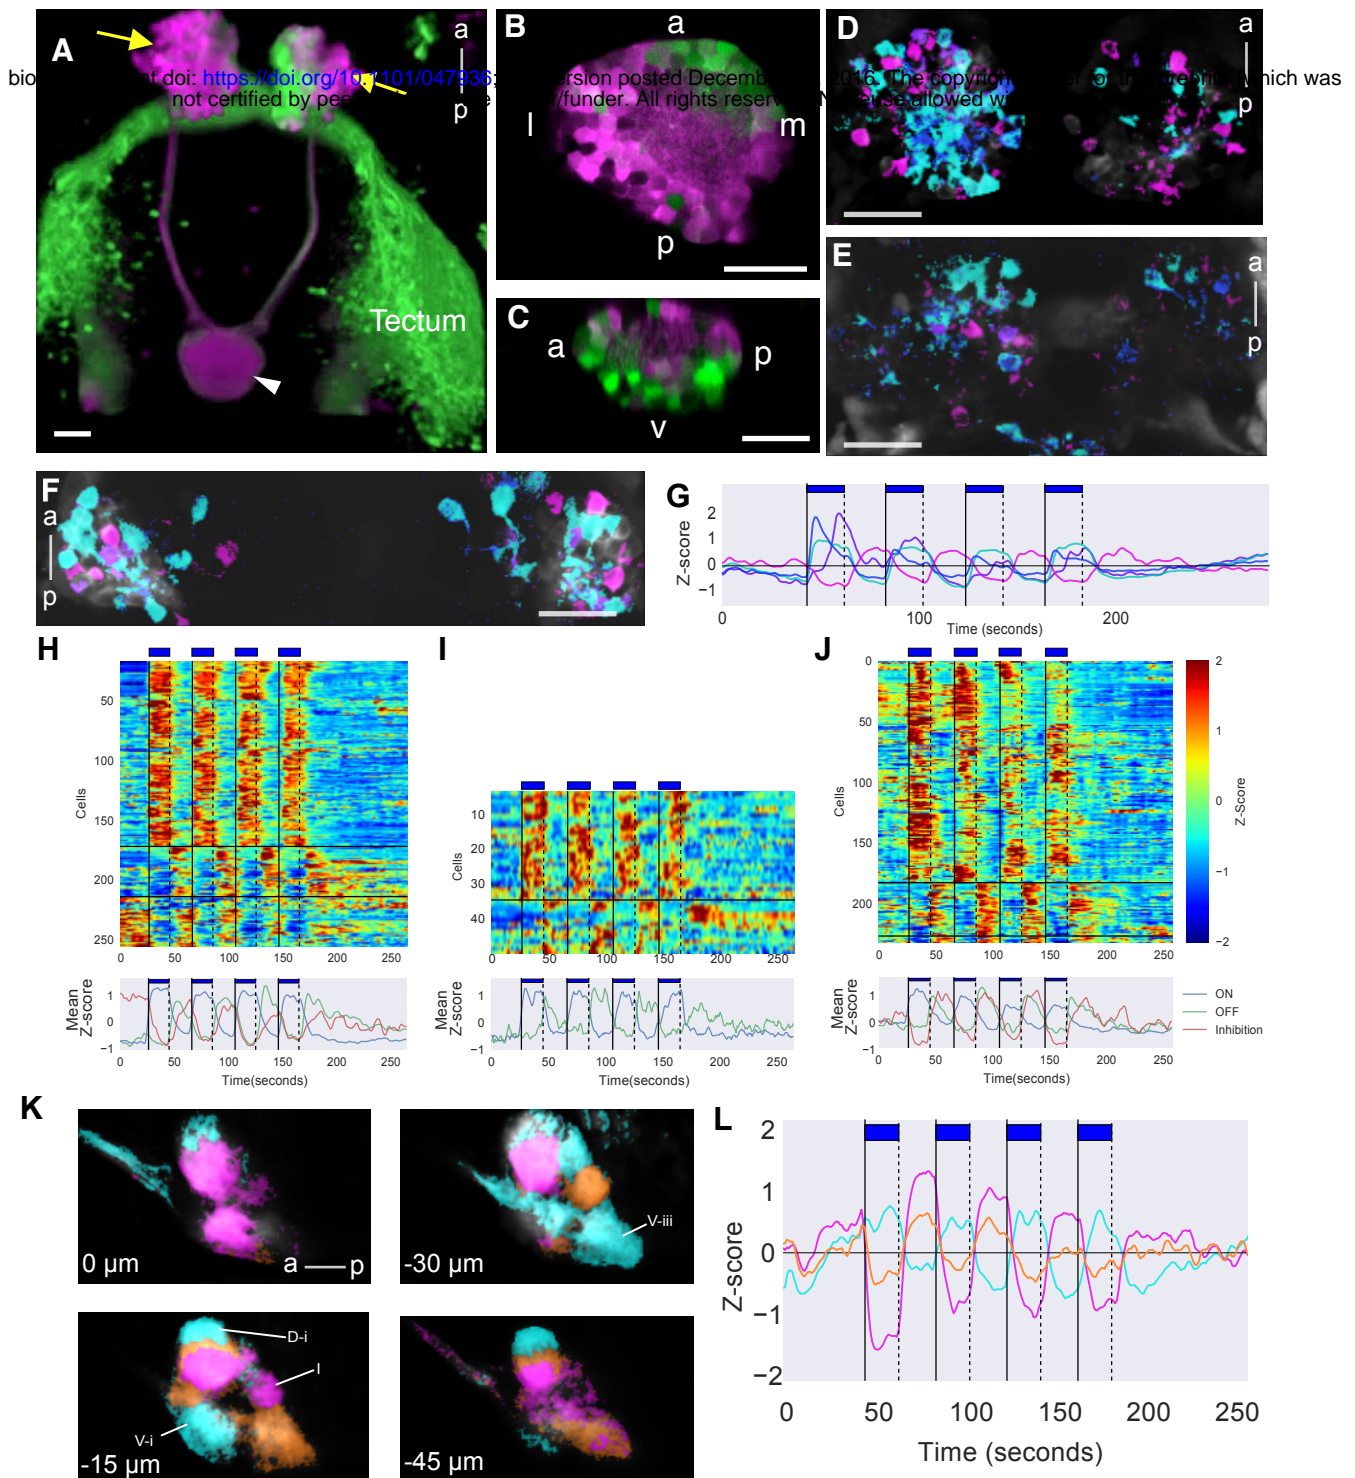

**Figure 3. The response of different habenula subdomains to change in irradiance.** (A-C) A *narp:GAL4, UAS:DsRed, Brn3a:eGFP* larva, with label in the dorsal habenula (arrows) and projection to the IPN (arrowhead). A coronal (B) and reconstructed sagittal (C) section through the left habenula, with dHbM in green and dHbL in magenta. (D) Spatial distribution of responses in the dorsal habenula of a *narp:GAL4, UAS:GCaMP6s* fish (8dpf). (E). Responses of non-DsRed cells in the dorsal habenula of a *elavl3:GCaMP6f, narp:GAL4, UAS:DsRed* fish (6dpf). (F) Responses in the ventral habenula of a *dao:GAL4, UAS:GCaMP6s* fish (6dpf). Pixels in panels D-F are coloured by their membership to k-means cluster centers. (G) Cluster centers obtained from running k-means on data in D-F. (H-J) Heatmaps plotting temporal traces from segmented cells in dHbL (H; n = 5 fish), dHbM (I; n = 5 fish) and vHb (J; n = 8 fish). The cells are sorted into ON, OFF and Inhibitory categories that are separated by a horizontal black line. Mean traces of each category are plotted below the heatmaps. (K-L) Activity in axons of habenula neurons innervating the interpeduncular nucleus, in a *s1011tGAL4, UAS:GCaMP3* fish. Four different planes are shown, in lateral view. All domains show evoked activity, and responses appear to be organized according to region of the IPN. Pixels are colour-coded according to the k-means clusters (L). In G-J and L, blue bars indicate the presence of light and vertical bold lines correspond to light onset while the dashed lines indicate light offset. a: anterior, p: posterior; l: lateral, m: medial. Scale bar = 25  $\mu$ m.

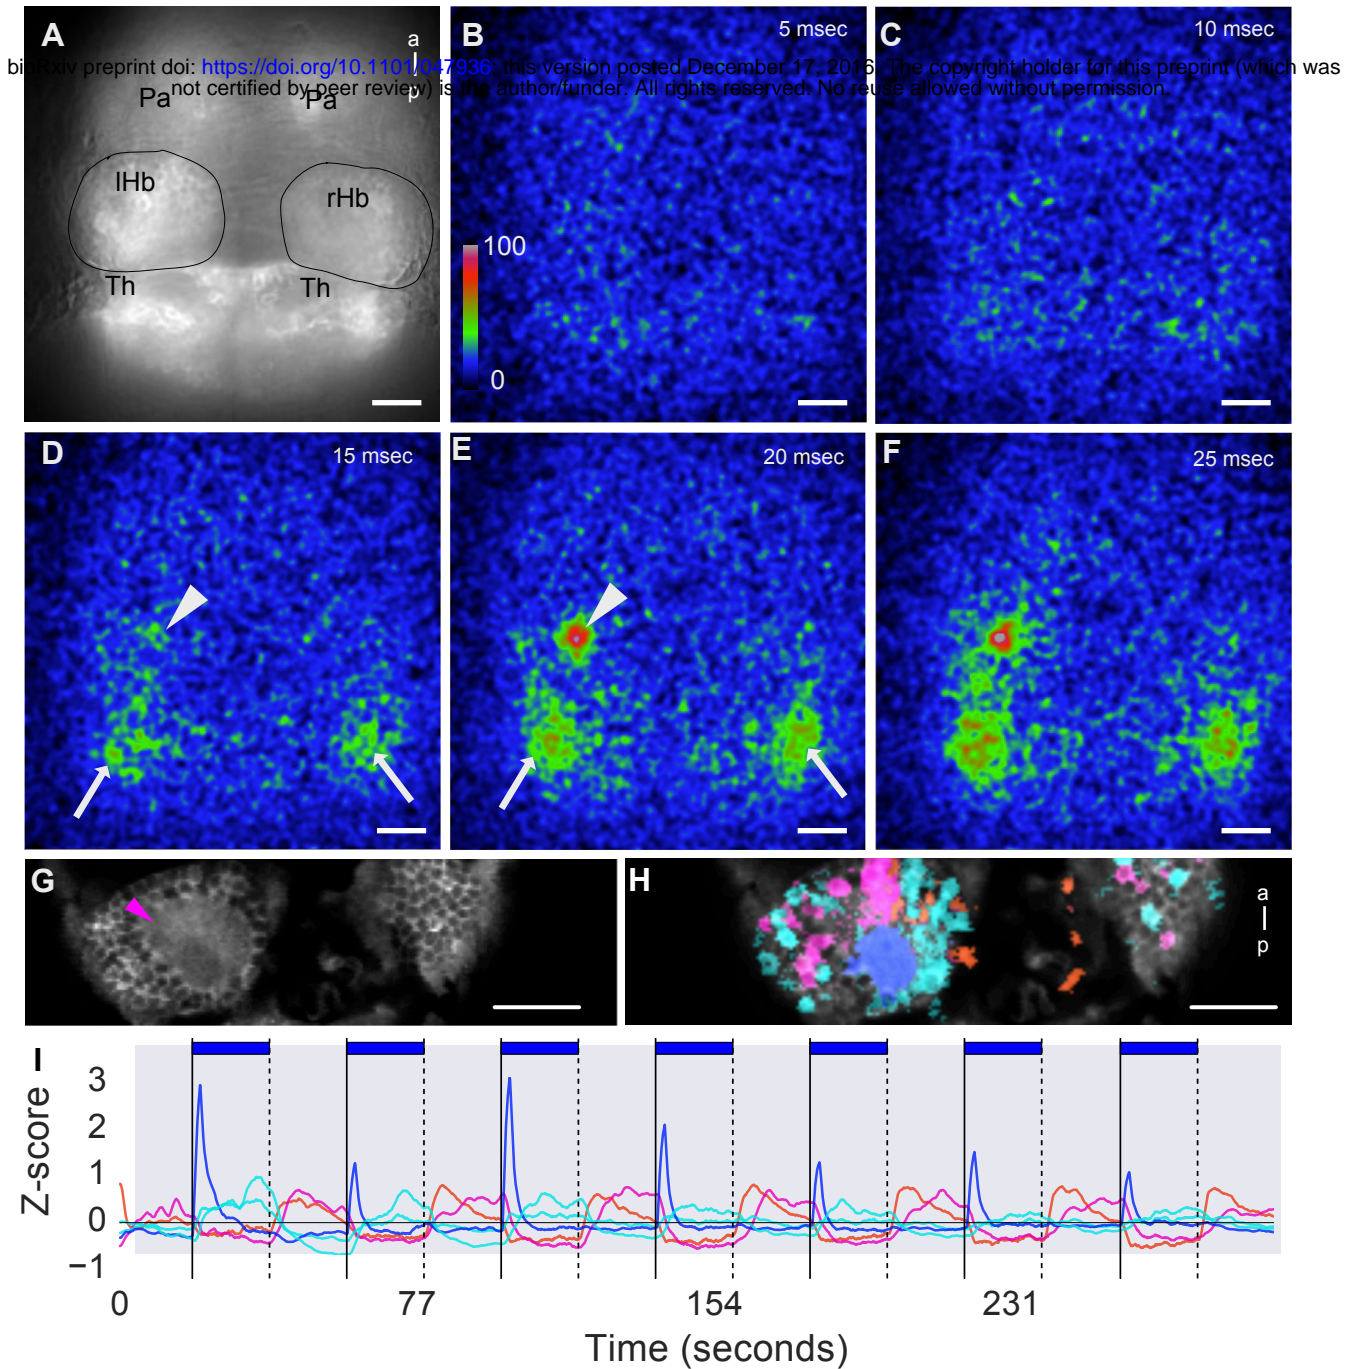

**Figure 4. Spatio-temporal characterization of light-evoked activity using high speed imaging.** (A-F) Widefield imaging at 200 Hz. (A) Average of all frames in the time-lapse, to show morphology. This is a dorsal view of a 5 day old fish *elav3:CaMP6f* fish. The habenula has been outlined in black. (B-F) Change in fluorescence relative to the preceding frame. An increase in fluorescence is seen in the thalamus (arrows) and in the left habenula (arrowhead). (G-I) Two photon imaging of the habenula in a *s1011tGAL4, UAS:GCaMP6s* fish, at 13 Hz. (G) Average of the time-lapse sequence, showing anatomy. The neuropil is indicated by the arrowhead. (H) Responses to pulses of light. Pixels are color-coded according to the traces in panel I. rHb: right habenula; IHb: left habenula. Panels A-E were smoothed using Gaussian blur with sigma = 1.7. The time indicated is time since start of illumination with the excitation blue LED.



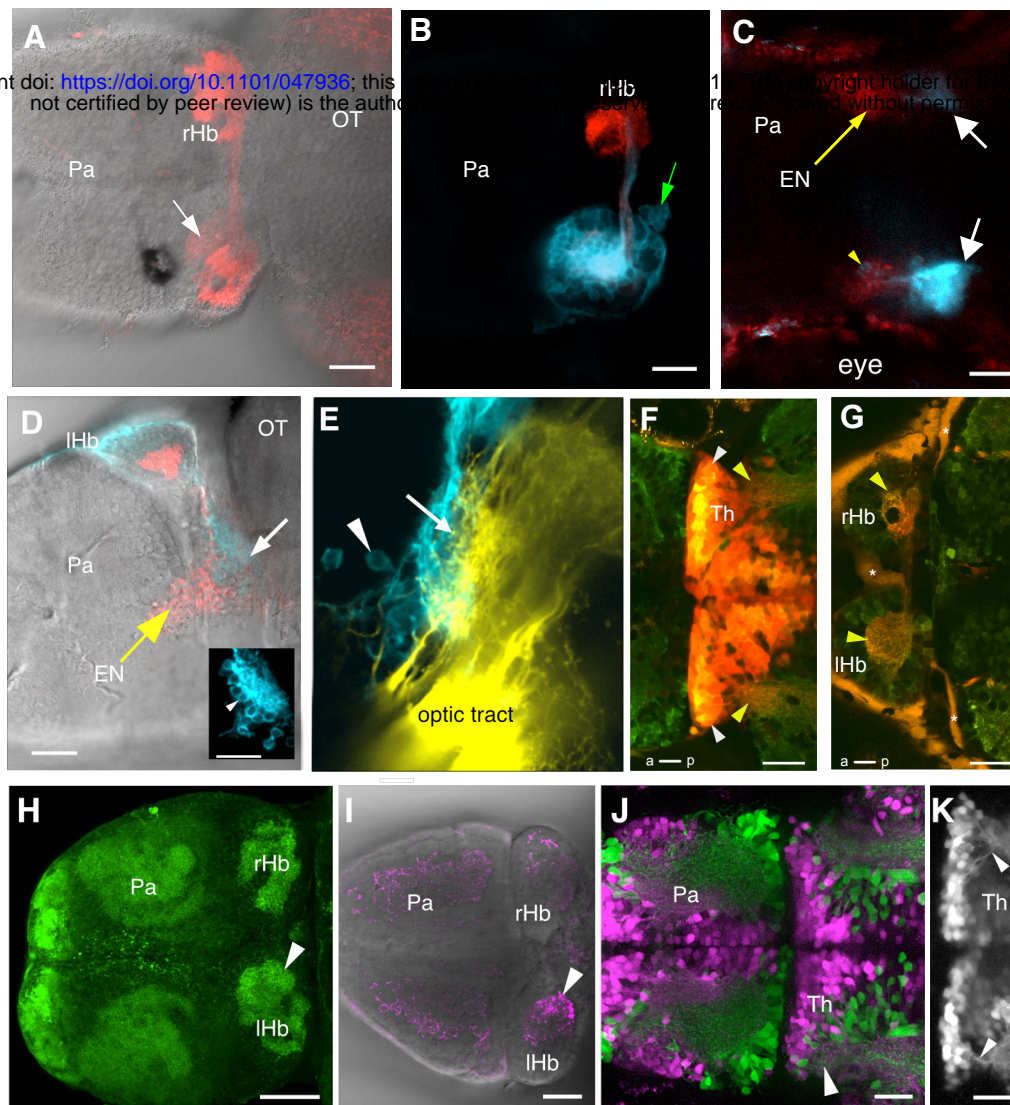

**Figure 5. The thalamus projection to the habenula.** (A) Dorsal view of the forebrain of a *Et(SqKR11)* larva, in which habenula afferents from the entopeduncular nucleus are labeled. The dorsal left neuropil (arrow) is weakly labeled. (B) Dorsal view of the habenula of a *Et(SqKR11)* larva, following DiD injection into the dorsal neuropil of the left habenula. The parapineal (arrow) has been retrogradely labeled. Habenula afferents from the entopeduncular nucleus are labeled in red. (C) 80 μm deeper in the same fish, showing label in the thalamus (white arrows). One retrogradely cell in the entopeduncular nucleus is visible (yellow arrowhead). (D) Lateral view of another larva, in which the dorsal left neuropil had been injected with DiD. The retrogradely labeled thalamic neuropil is indicated (white arrow). The entopeduncular nucleus is indicated by the yellow arrow. The inset shows a higher magnification labeled thalamic neuropil. Cell bodies are labeled (white arrowhead). (E) A close up view of the neuropil retrogradely labeled by DiD (cyan), in a fish where retinal ganglion cells had been labeled with Dil (yellow). RGC terminals intermingle with fibers from DiD-labeled cells innervating the neuropil (arrow). The arrowhead indicates a thalamic neuron labeled retrogradely with DiD. (F, G) Dorsal view of the thalamus (F) and habenula (G) of a fish expressing Kaede (red) under the control of the *s1020tGAL4* driver. Labeled cells are visible in the thalamus (F, white arrowheads). Labeled neurites are visible in the thalamic neuropil (F, yellow arrowheads) and in the habenula neuropils (G, arrowheads). GCaMP6f (green) is broadly expressed in this fish. (H) Dorsal view of a 6-day-old fish, labeled with an anti-vGlut1/2 antibody, which marks glutamatergic pre-synapses. All neuropils, including the dorsal left (arrowhead), are labeled. (I) Dorsal view showing label with an anti-GAD65/67 antibody. Labeled puncta are visible in the habenula neuropil (arrowhead). No labeled cell bodies were detected in the habenula. (J) A *gad1b:RFP, vGlut2:GAL4, UAS:eGFP* fish, with GABAergic cells indicated in magenta and glutamatergic cells shown in green. Both cell types can be detected in the thalamus. The arrowhead indicates the neuropil of the putative nucleus rostromedialis. (K) RFP expression in the thalamus of a *gad1b:RFP* fish. Arrowheads indicate neurites extending to the neuropil of the putative nucleus rostromedialis. All panels except (A) and (H) are single optical sections. Pa: pallium; rHb: right habenula; IHb: left habenula; Th: thalamus. EN: entopeduncular nucleus; OT: optic tectum; \*: auto-fluorescing pigment cell. Scale bar = 25 μm. Anterior is to the left in all cases.

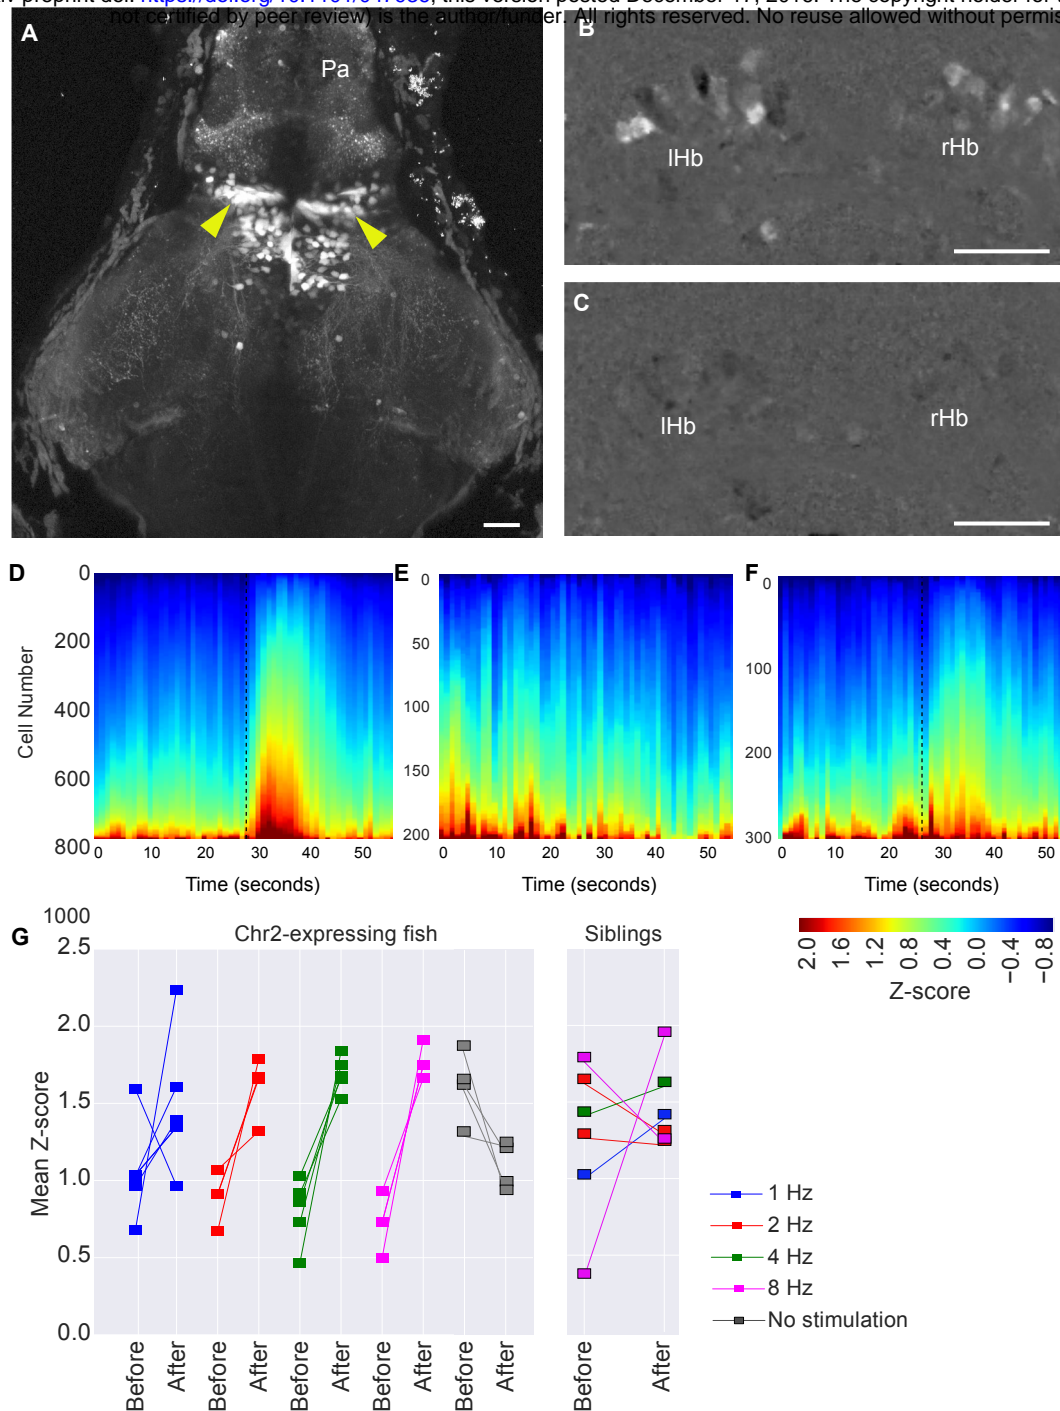

**Figure 6. Optogenetic stimulation of the thalamus triggers habenula activity.** (A) Expression

of Chr2-eYFP in the thalamus (arrowheads) of a 5 day old *s1020t:GAL4, UAS:Chr2-eYFP, elav13:GCaMP6f* fish. (B, C) Activity in the habenula of a Chr2-expressing fish, with (B) and without (C) blue LED stimulation of the thalamus. The images show the maximum projections of  $F/F_0$  images for a 25-second period after blue LED illumination, following subtraction of maximum projections of the period before illumination (i.e. difference in activity before and after stimulation). (D-F) Heatmaps showing temporal activity from cells segmented in fish with (D, E) and without (F) Chr2. In D (n = 5 fish) and F (n = 2 fish), blue light pulse was given at the time indicated by the black dashed line. No blue light stimulation was given in E (n = 4 fish). Z-scores were calculated by subtracting each time traces by the total mean and dividing by the standard deviation. (G) Mean amplitude of z-scores before and after optogenetic stimulation. Each square stands for a stimulus trial. Amplitude difference before and after stimulation in Chr2-expressing fish: mean  $\pm$  95% CI: 1 Hz:  $0.43 \pm 0.56$ , 2 Hz:  $0.72 \pm 0.35$ , 4 Hz:  $0.89 \pm 0.28$  and 8 Hz :  $1.05 \pm 0.18$ ; in siblings:  $0.21 \pm 0.51$ . Scale bar = 25  $\mu$ m.



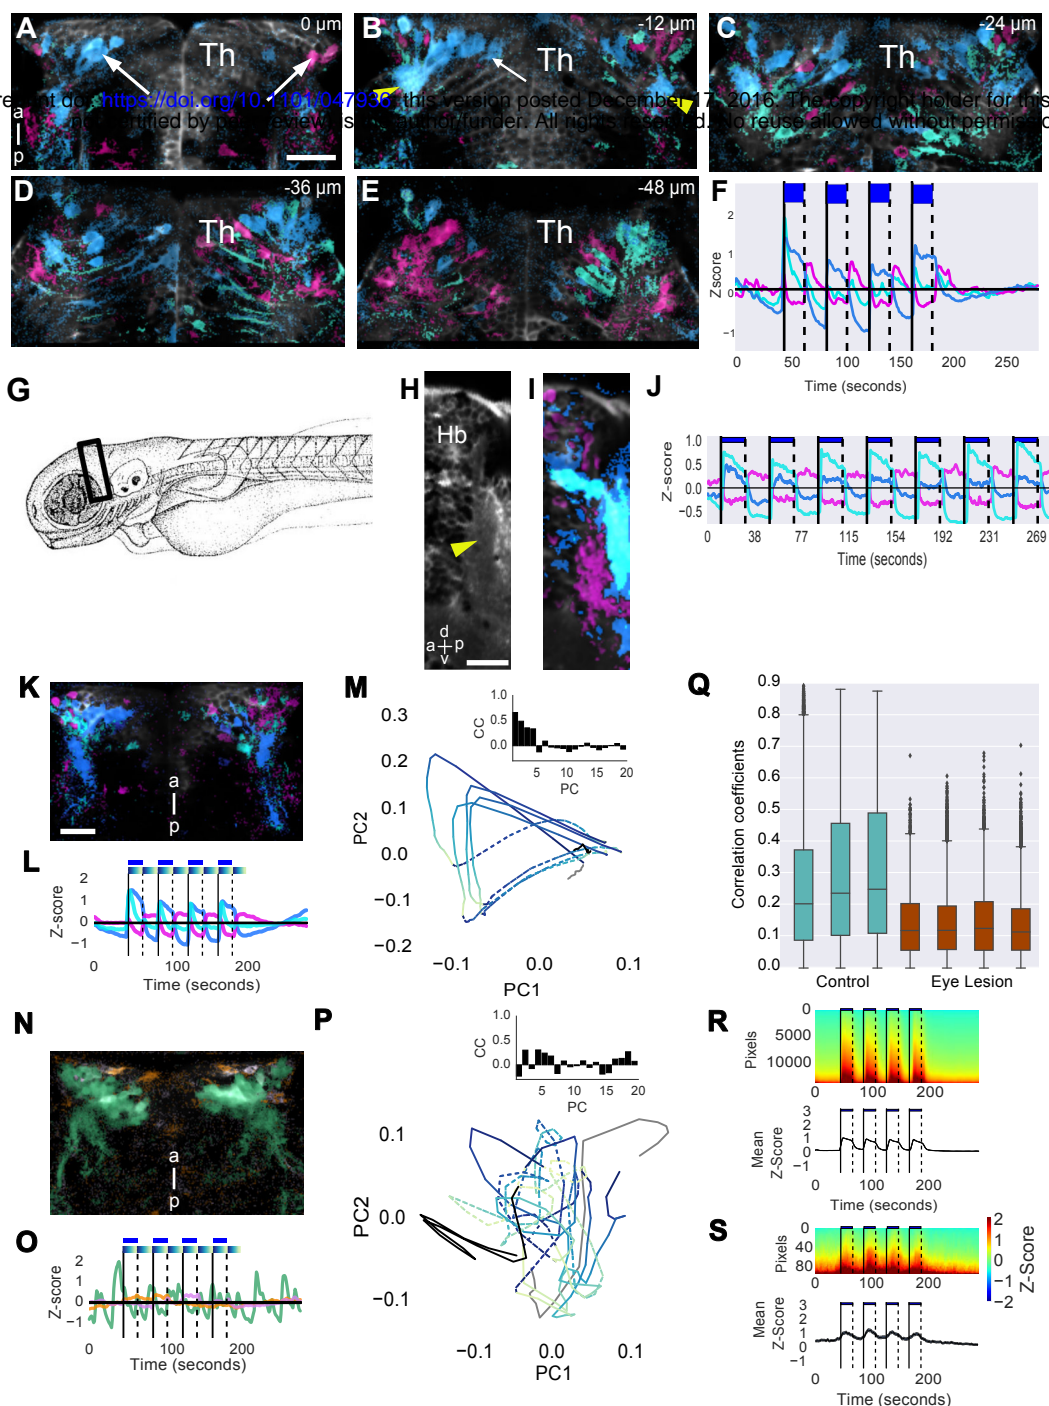

**Figure 7. Light-evoked activity in the thalamus.** (A-E) Evoked activity in five different focal planes, from dorsal to ventral, of a 5-day-old fish expressing GCaMP6s in thalamic neurons under the *s1020t* driver. Responses are seen in cell bodies (arrows) and in the thalamic neuropil (arrowheads). The colours represent k-means cluster centers (F). (G-J) Lateral view of light-evoked activity in the thalamus. (G) The region imaged. (H) Average projection of a lateral view of an *elav13:GCaMP6f* fish, showing the thalamic neuropil (arrowhead). (I) The response in this fish to four pulses of blue light. Pixels are colored according to the k-means cluster centers (J). (K-P) The effect of eye removal on light-evoked activity in the thalamus. (K-M) Response in a control (K-M) and eye lesioned fish (N-P), color-coded according to the k-means cluster centers in (L) and (O) respectively. (M, P) Trajectory of the thalamic response using the first two principal components (PC1 and PC2) in control (M) and lesioned (P) fish, colored according to the wedges in panels L and O to indicate the direction of the trajectories in Principal Component space following light ON and OFF. Controls, but not lesioned fish, show a reproducible response to light. Insets in M and P show the correlation coefficient (CC) of the first 20 PCs with a trace mimicking light evoked activity (see Methods). Unlike controls, the top 20 PCs in the eye lesioned fish showed weak correlation and did not pick up any light evoked response. (Q) Correlation coefficients between response of each thalamic pixel and a trace mimicking response to blue light in multiple *s1020tGAL4, UAS:GCaMP6s* fish. All positive correlation coefficients are plotted here. Each boxplot represents one fish. The black diamonds are outliers (see Methods). (R-S) Heatmaps showing the number of pixels with correlation coefficient > 0.5 in control (R) and fish lacking eyes (S). Traces below show the mean of all the pixels (black traces) and standard error of mean (shaded region). In panels F, J, L, O and R-S, light onset is indicated by the solid line, while light offset is indicated by the dashed line. Presence of light is indicated by the blue bars. a: anterior; p: posterior; d:dorsal, v: ventral. Th: thalamus; Hb:habenula. PC: Principal component, PC1: First principal component, PC2: Second principal component, CC: Correlation Coefficient. Scale bar = 25 μm. The drawing in panel G was obtained from [www.uoneuro.uoregon.edu](http://www.uoneuro.uoregon.edu)

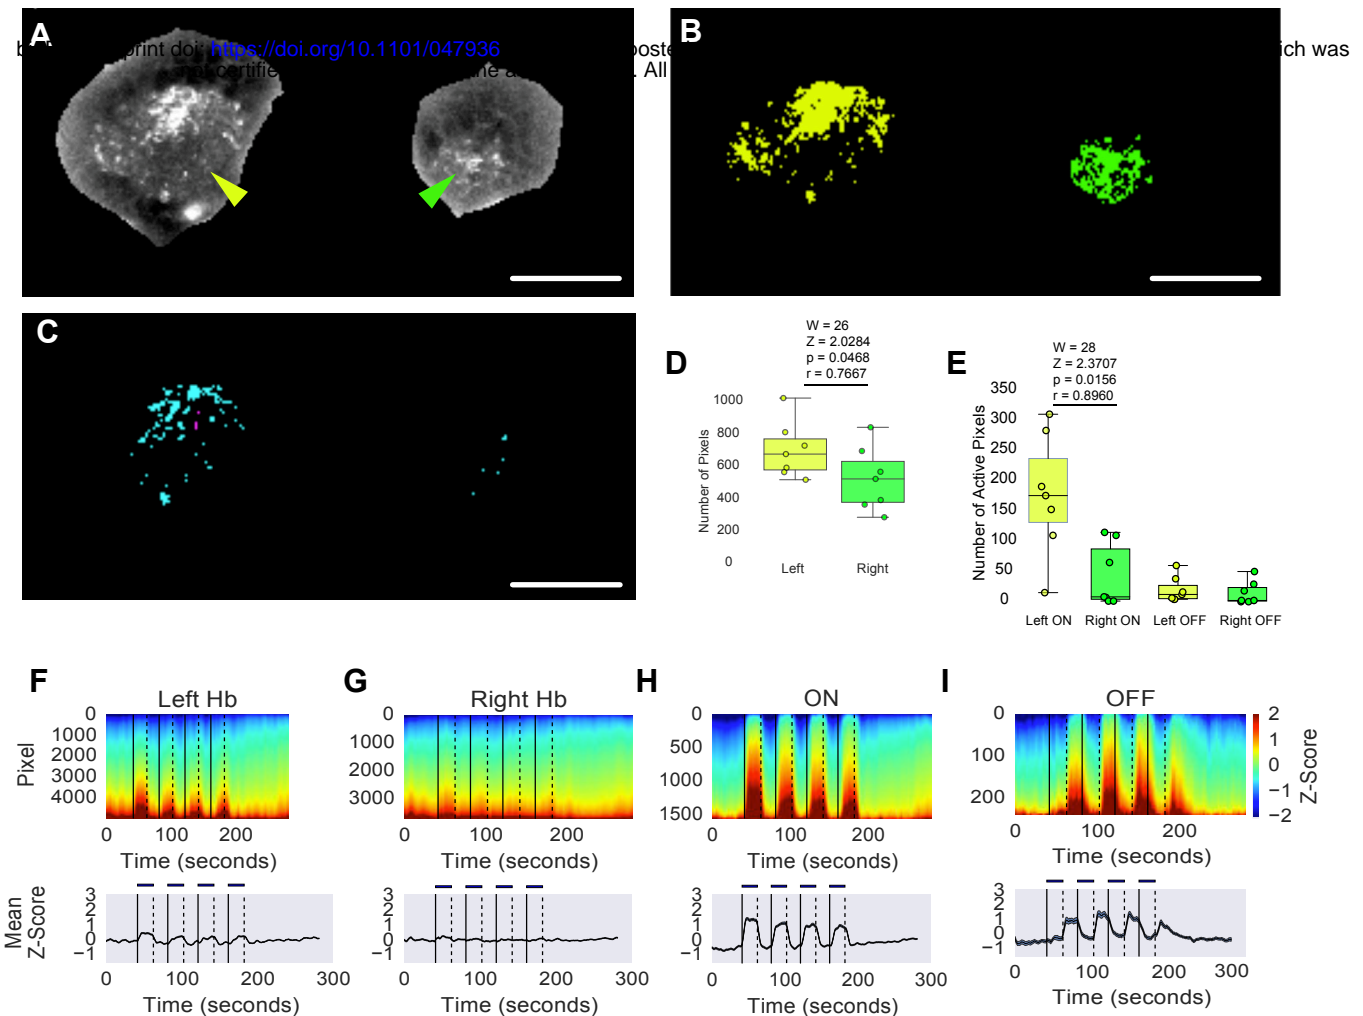

**Figure 8. Asymmetric light-evoked activity in thalamic axon terminals in the dorsal habenula.** (A) Standard deviation projection of a time-series recording of the dorsal habenula of a 6-day-old *s1020tGAL4,UAS:GCaMP6s* fish. The bright pixels are those with large change in activity. The surrounding skin, which was auto-fluorescent, has been masked. The dorsal left neuropil is indicated with a yellow arrowhead while the dorsal right neuropil is indicated with a green arrowhead. Habenula neurons are dimly auto-fluorescent. (B) Pixels within the dorsal neuropils with activity above 1 standard deviation, colour-coded yellow for left habenula and green for right habenula. This criteria included all terminals in the neuropils. (C) Pixels colour-coded according to whether they responded to light ON (cyan) or OFF (magenta). A relatively large proportion of pixels in the left neuropil responded, compared to the right (compare C with B). Pixels were selected by correlating their activity to a square wave form that was 1 during light ON (for ON pixels) and 1 during light OFF (for OFF pixels). Pixels with correlation coefficient greater than 0.5 were selected. (D-I) Analysis of multiple fish (n=7). (D) Boxplot of total number of pixels present in the left and right habenula. The number of terminals in left and right habenula were comparable across fish. (E) Number of terminals responding to light ON or light OFF. In D and E, each circle represent data from a single fish. p-value was obtained using non parametric paired Wilcoxon signed rank test. W is sum of the ranks, Z is the test statistic, and r is the effect size. (F-G) Heat maps of activity from all fish, in all thresholded pixels in the left habenula (F), the right habenula (G), and in pixels corresponding to light ON (H) and light OFF (I). Each line corresponds to a single pixel. Panels below show the average of the heat maps above. The shaded region is standard error of mean. Blue boxes indicate when light was delivered. Light onset is indicated by the solid line, while light offset is indicated by the dashed line. Anterior is to the top in panels A-C. Scale bar = 25  $\mu$ m.

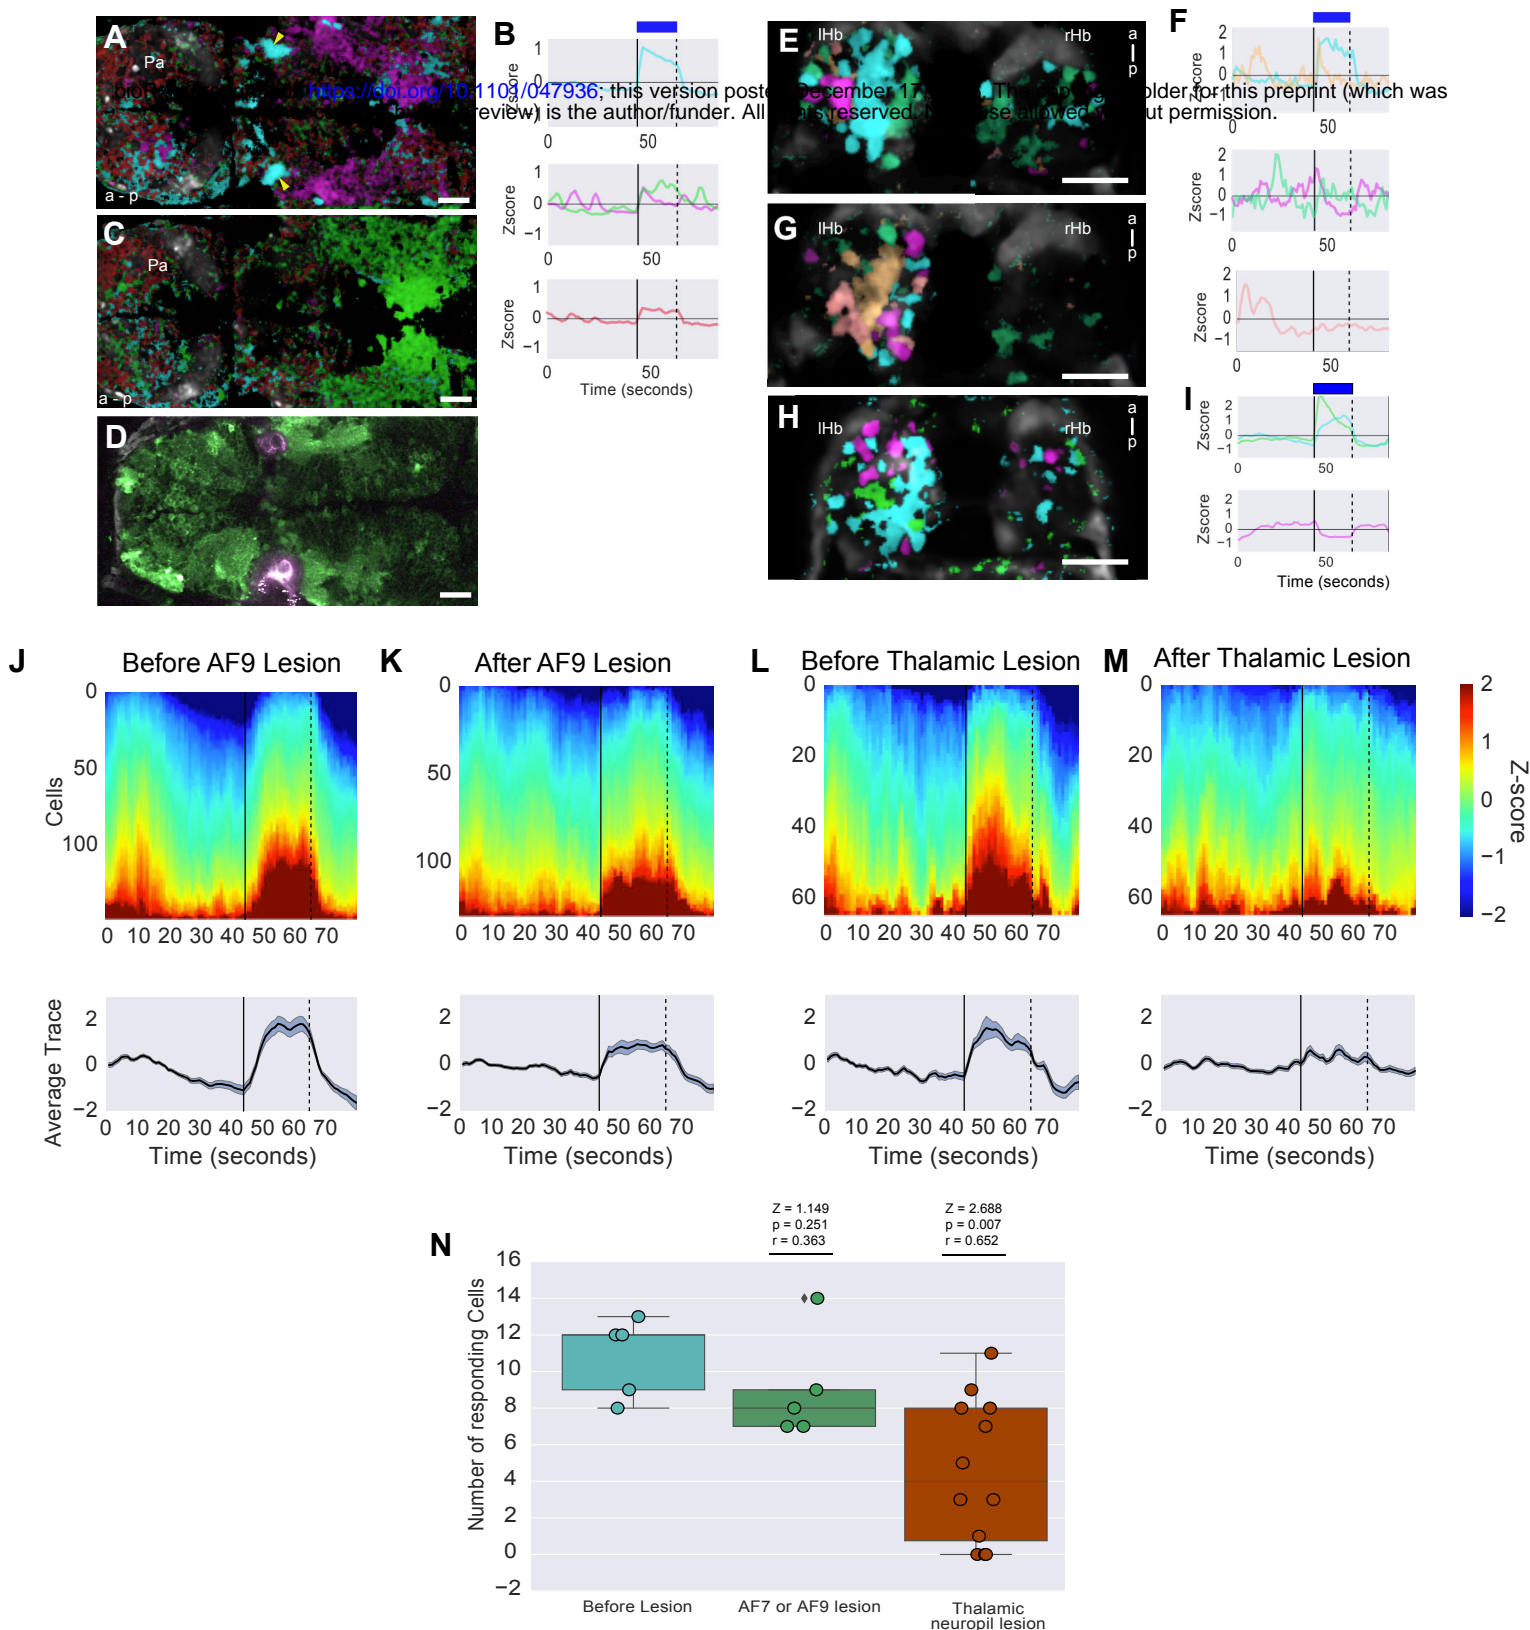

**Figure 9. The effect of lesioning the thalamus on habenula response to light.** (A-C) Dorsal view of an 8-day-old *elavl3:GCaMP6f* fish, showing neural responses before (A) and after (C) lesioning the region of the thalamic neuropil that responds to light (yellow arrowheads in panel A). Pixels in panels A and C are colored according to their activity, as indicated by traces in panel B. The prominent sustained response to light (cyan pixels) is reduced after lesion. (D) The extent of lesion, shown in magenta. (E-G) Habenula activity before (E) and after (G) lesion of the thalamic neuropil. Pixels are colored according to the traces in (F). There is a reduction in the sustained response to light, but some activity that is not stimulus-locked can be seen. (H) The habenula after lesion of AF9, with pixels colored according to the traces in panel (I). (J-M) Heatmaps showing activity in segmented cells before (J) and after (K) AF9 lesion, and before (L) and after (M) thalamic neuropil lesion in one fish. Panels below show mean (black trace) and standard error of mean (shaded region). Light evoked activity is missing following this lesion. (N) Boxplot showing number of cells in one plane of the dorsal left habenula that are excited by blue light, following lesion of the thalamic neuropil ( $n = 12$  fish), or AF7 ( $n = 2$  fish) or AF9 ( $n = 3$  fish), or before lesion ( $n = 5$  fish). P-value was obtained using non parametric Wilcoxon rank sum test. Z is the test statistic, and r is the effect size. The statistical comparisons were made between before lesion and after lesion. a: anterior; p: posterior; Pa: pallium; rHb: right habenula. Images are all single optical sections. Scale bar = 25  $\mu\text{m}$ .



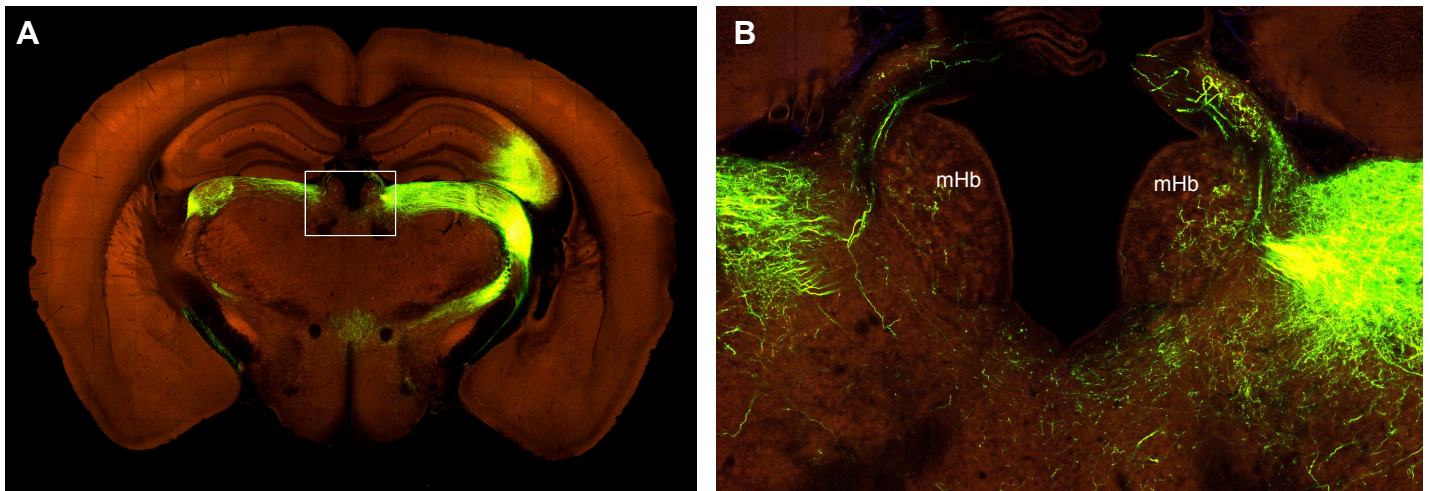

**Figure 10. A potential projection from the ventral lateral geniculate nucleus to the habenula in a mouse.** Anterograde label was performed by injecting recombinant adeno associated virus into the ventral lateral geniculate nucleus. 0.33 mm<sup>3</sup> was injected into Bregma (-2.46, 2.6, 2.36, 0) of a p56 slc32a1-IRES-Cre mouse, which expresses Cre in GABAergic neurons (Oh et al., 2014). (A) Coronal view, showing an overview of the label. (B) A high magnification of the area boxed in panel A, showing labeled fibers in the habenula. mHb: medial habenula. These images are from [http://connectivity.brain-map.org/projection/experiment/siv/267538006?imageId=267538231&imageType=TWO\\_PHOTON,SEGMENTATION&initImage=TWO\\_PHOTON&x=14704&y=7847&z=3](http://connectivity.brain-map.org/projection/experiment/siv/267538006?imageId=267538231&imageType=TWO_PHOTON,SEGMENTATION&initImage=TWO_PHOTON&x=14704&y=7847&z=3).
